1 **A comparative analysis of memory B cell and antibody responses against**  
2 ***Plasmodium falciparum* merozoite surface protein 1 in children and adults from**  
3 **Uganda**

4  
5 S. Jake Gonzales<sup>1</sup>, Kathleen N. Clarke<sup>1</sup>, Gayani Batugedara<sup>1</sup>, Ashley E. Braddom<sup>1</sup>,  
6 Rolando Garza<sup>1</sup>, Raphael A. Reyes<sup>1</sup>, Isaac Ssewanyana<sup>2,3</sup>, Kendra C. Garrison<sup>4</sup>,  
7 Gregory C. Ippolito<sup>5</sup>, Bryan Greenhouse<sup>6</sup>, Sebastiaan Bol<sup>1</sup>, and Evelien M. Bunnik<sup>1\*</sup>

8  
9 <sup>1</sup> Department of Microbiology, Immunology and Molecular Genetics, Long School of  
10 Medicine, The University of Texas Health Science Center at San Antonio, San Antonio,  
11 TX, USA

12 <sup>2</sup> Infectious Disease Research Collaboration, Kampala, Uganda

13 <sup>3</sup> London School of Hygiene and Tropical Medicine, London, UK

14 <sup>4</sup> Department of Chemical Engineering, University of Texas at Austin, Austin, TX, USA

15 <sup>5</sup> Department of Molecular Biosciences and Department of Oncology, Dell Medical  
16 School, University of Texas at Austin, Austin, TX 78712, USA

17 <sup>6</sup> Department of Medicine, University of California San Francisco, San Francisco, CA,  
18 USA

19  
20 **\*Correspondence**

21 Evelien M. Bunnik, Ph.D.

22 [bunnik@uthscsa.edu](mailto:bunnik@uthscsa.edu)

23 7703 Floyd Curl Drive

24 San Antonio, TX 78229

25 United States of America

26  
27 **Keywords:** adaptive immune response; humoral immunity; IgM; IgG; somatic  
28 hypermutation; antibodies; memory B cells

29

30 **Abstract**

31 Memory B cells (MBCs) and plasma antibodies against *Plasmodium falciparum*  
32 merozoite antigens are important components of the protective immune response  
33 against malaria. To gain understanding of how responses against *P. falciparum* develop  
34 in these two arms of the humoral immune system, we evaluated MBC and antibody  
35 responses against the most abundant merozoite antigen, merozoite surface protein 1  
36 (MSP1), in individuals from a region in Uganda with high *P. falciparum* transmission.  
37 Our results showed that MSP1-specific B cells in adults with immunological protection  
38 against malaria were predominantly IgG<sup>+</sup> classical MBCs, while children with incomplete  
39 protection mainly harbored IgM<sup>+</sup> MSP1-specific classical MBCs. In contrast, anti-MSP1  
40 plasma IgM reactivity was minimal in both children and adults. Instead, both groups  
41 showed high plasma IgG reactivity against MSP1 and whole merozoites, with  
42 broadening of the response against non-3D7 strains in adults. The antibodies encoded  
43 by MSP1-specific IgG<sup>+</sup> MBCs carried high levels of amino acid substitutions and  
44 recognized relatively conserved epitopes on the highly variable MSP1 protein.  
45 Proteomics analysis of MSP1<sub>19</sub>-specific IgG in plasma of an adult revealed a limited  
46 repertoire of anti-MSP1 antibodies, most of which were IgG<sub>1</sub> or IgG<sub>3</sub>. Similar to MSP1-  
47 specific MBCs, anti-MSP1 IgGs had relatively high levels of amino acid substitutions  
48 and their sequences were predominantly found in classical MBCs, not atypical MBCs.  
49 Collectively, these results showed evolution of the MSP1-specific humoral immune  
50 response with cumulative *P. falciparum* exposure, with a shift from IgM<sup>+</sup> to IgG<sup>+</sup> B cell  
51 memory, diversification of B cells from germline, and stronger recognition of MSP1  
52 variants by the plasma IgG repertoire.

## 53 Introduction

54 Malaria, caused by the parasite *Plasmodium falciparum*, is responsible for  
55 approximately half a million deaths every year, of which two-thirds occur in children  
56 under the age of five (1). A much larger number of people experience non-fatal malaria,  
57 amounting to an estimated 230 million cases of disease annually. Although the mortality  
58 rate for malaria has slowly but consistently declined over the past two decades, the  
59 decrease in malaria incidence has plateaued in the past five years. Current  
60 interventions are thus insufficient for malaria elimination and novel tools, such as a  
61 highly efficacious malaria vaccine, are urgently needed in the fight against this  
62 devastating disease. RTS,S, the only malaria vaccine that has elicited protection  
63 against (severe) malaria in a phase III clinical trial, had an efficacy against clinical  
64 malaria of 30 – 40% in infants and young children (2). Vaccine efficacy was high shortly  
65 after vaccination but declined rapidly, and was lower against parasites that were  
66 genetically different from strain 3D7 that the subunit vaccine RTS,S was based on (3).  
67 Compared to vaccination, repeated natural *P. falciparum* infections eventually elicit  
68 superior immunity, consisting of relatively long-lived antibody responses (~2 – 4 years)  
69 with cross-strain reactivity (4, 5). This naturally acquired humoral immunity against  
70 malaria is associated with the presence of circulating immunoglobulin G (IgG) against  
71 *Plasmodium* blood stage antigens (6-13). Recently, immunoglobulin M (IgM) has  
72 received increased attention as IgM responses were also shown to correlate with  
73 protection and were able to inhibit parasite growth *in vitro* (14-16). A complete  
74 understanding of the development of humoral immune responses against *P. falciparum*

75 blood stage antigens over time will help with the development of a more effective and  
76 longer lasting vaccine than RTS,S.

77 Effective and long-lasting humoral immune responses against pathogens consist of  
78 long-lived memory B cells (MBCs) in the circulation and plasma cells that reside in the  
79 bone marrow and secrete large amounts of antibody into the circulation (reviewed in  
80 (17)). In the case of *P. falciparum*, long-lived humoral immunity develops over the  
81 course of years of repetitive infections, leaving young children largely susceptible to  
82 disease. With cumulative *P. falciparum* exposure, the quality of B cell responses  
83 gradually improves. Both MBCs and plasma cells generated in response to *P.*  
84 *falciparum* infection are short-lived in young children but gradually increase in longevity  
85 in adolescents and adults (4, 18, 19). Over time, antibody responses also recognize a  
86 larger number of parasite antigens (18). In addition, recurrent infections drive  
87 the generation of antibodies capable of mediating cross-strain immunity, which is  
88 strongly associated with protection (5). Most studies into the development of antibody  
89 responses against *P. falciparum* have been performed using serum. However, this  
90 prevents investigating the molecular characteristics of *P. falciparum*-specific antibodies.  
91 In addition, little is known about the connection between the MBC and plasma cell  
92 compartments. This information will be useful for understanding how durable immunity  
93 against malaria develops and may enable us to harness lessons from naturally acquired  
94 immunity for improved vaccine design.

95 In this study, we set out to investigate differences in humoral immune responses in  
96 between children with incomplete protection against malaria and adults who have  
97 developed strong immunological protection to better understand how MBC and antibody

98 responses develop over the course of life-long *P. falciparum* exposure. To do this, we  
99 compared the antibody and MBC response against *P. falciparum* antigen merozoite  
100 surface protein 1 (MSP1) between children and adults living in a region of high *P.*  
101 *falciparum* transmission in Uganda. MSP1 is a large, polymorphic, and highly  
102 immunogenic protein expressed ubiquitously on the surface of the parasite during the  
103 late schizont and merozoite stages (20, 21). MSP1 has long been considered a vaccine  
104 target since antibody responses against this protein have been associated with  
105 protection (6, 20, 22), although results from MSP1-based vaccine trials have been  
106 disappointing (23, 24). However, since MSP1 has high antigenic heterogeneity across  
107 *P. falciparum* strains, we considered it an excellent model antigen to assess antibody  
108 cross-strain reactivity elicited by natural infection. We studied the isotype of MSP1-  
109 specific MBCs, sequence characteristics of monoclonal antibodies isolated from IgM<sup>+</sup>  
110 and IgG<sup>+</sup> MBCs, and cross-strain reactivity against MSP1 variants in both plasma  
111 antibodies and B cells. In addition, we analyzed the anti-MSP1 plasma IgG repertoire  
112 and investigated characteristics of antibodies that were found in both the MBC and  
113 plasma IgG compartment in more detail.

114

## 115 **Results**

### 116 **MSP1-specific B cells have a classical phenotype and are enriched for IgG in** 117 **adults**

118 To study differences in naturally acquired B cell responses against MSP1 between  
119 partially immune and immune individuals, we selected four children and four adults  
120 residing in Tororo, Uganda, a region with high malaria transmission intensity year-round

121 **(Supplementary table 1)** (25). These individuals were participants of cohort studies,  
122 with the exception of two Ugandan adults who were anonymous blood donors with high  
123 levels of plasma antibodies against various malaria antigens, suggesting frequent  
124 exposure to *P. falciparum* (**Supplementary figure 1**). Cryopreserved PBMCs were  
125 used to first isolate bulk B cells, followed by staining with fluorescently labeled tetramers  
126 of full-length MSP1 from *P. falciparum* strain 3D7 (MSP1<sub>3D7</sub>) and decoy tetramers for  
127 analysis by flow cytometry, a strategy developed and used by others (26, 27) (**Figure**  
128 **1A**). In both children and adults, MSP1-specific B cells (defined as  
129 CD19<sup>+</sup>CD20<sup>+</sup>MSP1<sup>+</sup>decoy<sup>-</sup>) were predominantly found among CD21<sup>+</sup>CD27<sup>+</sup> classical  
130 memory B cells (MBCs) (**Figure 1B**). In addition, in both groups, very few MSP1-  
131 specific B cells were found among CD21<sup>-</sup>CD27<sup>-</sup> atypical MBCs (**Figure 1B**). To further  
132 define the phenotype of MSP1-specific B cells, we determined the isotype usage of  
133 MSP1-specific classical MBCs. Children showed much larger percentages of IgM<sup>+</sup>  
134 (median, ~70%) than IgG<sup>+</sup> (median, ~10%) classical MBCs in the total repertoire, which  
135 was reflected in the percentage of IgM<sup>+</sup> and IgG<sup>+</sup> MSP1-specific classical MBCs (**Figure**  
136 **1C**). In contrast, IgM<sup>+</sup> and IgG<sup>+</sup> classical MBCs were equally abundant in adults in the  
137 total repertoire, while IgM<sup>+</sup> MSP1-specific classical MBCs were depleted and IgG<sup>+</sup>  
138 MSP1-specific classical MBCs were slightly enriched (**Figure 1C**). The ratio of IgG<sup>+</sup> to  
139 IgM<sup>+</sup> MSP1-specific classical MBCs was higher in all adults as compared to the children  
140 (**Figure 1D**). Collectively, these results suggest that the B cell response against MSP1  
141 is skewed to IgM<sup>+</sup> classical MBCs in children, while it is dominated by IgG<sup>+</sup> classical  
142 MBCs in adults. These results are in line with a recent report that showed an increased  
143 frequency of IgM usage among *P. falciparum*-specific B cells in young children as

144 compared to older children and adults in Mali, where malaria transmission is highly  
145 seasonal (16), suggesting that this is a general feature of the B cell response to *P.*  
146 *falciparum* in children in malaria-endemic regions.

147

### 148 **Recombinant antibodies from isolated memory B cells are MSP1-specific and** 149 **inhibit parasite growth**

150 To confirm antigen-specificity of MSP1-specific B cells, all IgM<sup>+</sup> and IgG<sup>+</sup> MSP1-specific  
151 B cells were single-cell-sorted into 96-well culture plates containing CD40L-expressing  
152 feeder cells, cytokines, and other stimuli that collectively promote B cell survival,  
153 expansion, and differentiation into antibody-secreting cells. This allowed us to screen B  
154 cell clones for antigen-specificity prior to cloning and expression of recombinant mAbs.  
155 B cell supernatants were tested for the presence of anti-MSP1 antibodies by a *P.*  
156 *falciparum* strain 3D7 merozoite ELISA or Luminex assay using recombinant MSP1<sub>3D7</sub>.  
157 These assays were implemented into our analysis pipeline only in later experiments and  
158 these data are therefore missing for samples analyzed earlier. The variable regions of  
159 antibodies with confirmed reactivity to merozoites or recombinant MSP1 were cloned  
160 into linear expression cassettes, expressed as recombinant IgG<sub>1</sub>, and against tested for  
161 MSP1 reactivity (**Figure 2A**). As was reported in a recently published article (15), most  
162 anti-MSP1 IgM antibodies lost their reactivity to MSP1 when expressed as IgG<sub>1</sub>, which  
163 is likely a result of the lower avidity of monomeric IgG as compared to pentameric IgM.  
164 We therefore cloned a multimerization domain into the C-terminus of the IgG<sub>1</sub> heavy  
165 chain to express IgM-derived antibodies as pentameric IgG. In contrast to results  
166 reported by Thouvenel *et al.* (15), we were unable to rescue the MSP1-reactivity of IgM-

167 derived variable regions by expression as pentameric IgG (**Figure 2A**). The only  
168 pentameric IgG with reactivity to MSP1 was also reactive when expressed in  
169 monomeric form. To further confirm the specificity and functionality of the isolated anti-  
170 MSP1 mAbs, we performed immunofluorescence assays on segmented schizonts for  
171 three randomly selected IgG mAbs, showing the expected surface staining of  
172 merozoites (**Figure 2B**). We also performed growth-inhibition assays for six IgG mAbs  
173 that were selected based on high expression levels in culture. At a concentration of 200  
174  $\mu\text{g/ml}$ , these six mAbs showed on average 51% (range, 17% – 65%) inhibition of *P.*  
175 *falciparum* growth as compared to a negative control, demonstrating their ability to  
176 functionally inhibit the parasite (**Figure 2C**).

177

### 178 **MSP1-specific IgG<sup>+</sup> MBC lineages from a malaria-experienced adult are highly** 179 **diversified and expanded**

180 Next, we set out to study the molecular characteristics of antibodies encoded by MSP1-  
181 specific MBCs. In total, we isolated 6 IgM and 25 IgG mAbs with confirmed MSP1  
182 reactivity from 6 donors. Full-length heavy and light chain variable regions were  
183 obtained and analyzed using IMGT/V-QUEST (28) to determine the level of amino acid  
184 substitutions in the V gene segments of the variable regions. MSP1-specific IgM<sup>+</sup> MBCs  
185 from adults and children carried few amino acid substitutions in both the heavy and light  
186 chain V gene segments (average, <1% amino acid changes), while many of the IgG<sup>+</sup>  
187 MBCs were highly mutated (>15% amino acid changes; **Figure 3A,B**). None of the IgM<sup>+</sup>  
188 MBCs were clonally related to each other, defined as sequences using the same heavy  
189 chain V and J gene and having a highly similar heavy chain complementarity



190 determining region 3 (HCDR3;  $\geq 85\%$  amino acid similarity). In contrast, several clonally  
191 expanded IgG<sup>+</sup> MBC lineages were identified in adult donor 2, from whom most mAbs  
192 were derived (**Figure 3A,B**). B cells belonging to expanded lineages were among those  
193 that were the most diversified from the germline antibody sequences, particularly in the  
194 heavy chain V gene segment. Finally, although there was no statistically significant  
195 difference in the length of the HCDR3 between IgM and IgG sequences, several IgG  
196 sequences harbored long HCDR3s ( $\geq 20$  amino acids), while IgM sequences had  
197 average or relatively short HCDR3s (**Figure 3C**).

198

### 199 **Anti-MSP1 plasma antibody responses are dominated by IgG in both children and** 200 **adults**

201 A study of B cell responses upon influenza virus vaccination reported that the largest  
202 clonal B cell families were directed against the most conserved epitopes (29). Based on  
203 these observations, we hypothesized that clonally expanded anti-MSP1 IgG<sup>+</sup> MBC  
204 lineages would have cross-strain reactivity, whereas non-expanded IgG<sup>+</sup> MBC lineages  
205 would be strain-specific. To test this hypothesis, we developed a Luminex assay using  
206 beads coated with full-length MSP1 variants from the geographically and genetically  
207 distinct *P. falciparum* strains 3D7 (African origin), Dd2 (South-east Asian origin), and  
208 HB3 (Central American origin). 21 out of 22 mAbs (95%) tested in this assay bound to  
209 MSP1<sub>3D7</sub> (**Figure 4A**). This high reactivity with MSP1<sub>3D7</sub> was expected since MSP1<sub>3D7</sub>  
210 was used for the isolation of MSP1-specific B cells. It is therefore unclear why one mAb  
211 bound MSP1<sub>Dd2</sub> but not MSP1<sub>3D7</sub>. All other mAbs showed reactivity with at least one  
212 other MSP1 variant, and the majority showed reactivity with both MSP1<sub>Dd2</sub> and

213 MSP1<sub>HB3</sub>, including all mAbs from the largest clonal lineage (**Figure 4A**). These results  
214 suggest that the majority mAbs recognized relatively conserved epitopes, irrespective of  
215 the level of clonal expansion of the B cell lineage. Unfortunately, we were unable to  
216 determine reactivity of mAbs isolated from IgM<sup>+</sup> MBCs against the three MSP1 variants  
217 from different *P. falciparum* strains, because of the loss of antigen reactivity when these  
218 mAbs were expressed as IgG. In addition, most mAbs were derived from a single donor,  
219 limiting the conclusions we could draw from this experiment.

220

221 To expand on the results of cross-strain reactivity of mAb against MSP1 and to  
222 determine whether the MSP1-specific MBC isotype differences we observed between  
223 children and adults are reflected in the plasma antibody response, we tested plasma  
224 samples from 24 adults and 18 children for IgM and IgG reactivity against MSP1 from  
225 the three *P. falciparum* strains (**Supplementary table 2**). This experimental design  
226 provides a measurement of the overall antibody reactivity of the plasma but does not  
227 discriminate between antibodies with cross-strain reactivity or a combination of multiple  
228 strain-specific antibodies. However, it will reveal whether anti-MSP1 antibody responses  
229 broaden with cumulative *P. falciparum* exposure. As a control, we included plasma  
230 samples from recovered US COVID-19 patients who showed IgM and IgG reactivity  
231 against the SARS-CoV-2 receptor binding domain, but not against the three *P.*  
232 *falciparum* MSP1 variants. In both children and adults, anti-MSP1 IgM reactivity in the  
233 plasma was very low, although four of the 24 adult samples contained anti-MSP1 IgM  
234 against at least one MSP1 variant antigen (**Figure 4B**). In contrast, all samples showed  
235 strong IgG reactivity against all MSP1 variants (**Figure 4C**). Adults had higher plasma

236 IgG reactivity against MSP1<sub>HB3</sub> than children. The average reactivity of adult samples  
237 against MSP1<sub>Dd2</sub> was also higher but not statistically significantly different from that in  
238 children ( $P = 0.06$ ). These results suggest that while children already have plasma IgG  
239 against different variants of MSP1, this response continues to broaden with age.

240 To determine whether the differential IgM and IgG reactivity of plasma is specific for  
241 anti-MSP1 antibodies or can be extrapolated to anti-merozoite antibody responses in  
242 general, we also tested reactivity of plasma IgM and IgG to whole merozoites from *P.*  
243 *falciparum* strain 3D7. In this assay, we observed anti-IgM and anti-IgG reactivity in both  
244 groups, with adults showing higher reactivity for both IgM and IgG as compared to  
245 children (**Figure 4D**). IgM and IgG anti-merozoite reactivity were not directly compared  
246 since the values measured could have been influenced by the binding affinity of the  
247 secondary antibody. Collectively, these results suggest that in contrast to our  
248 observation that the MBC response in children is enriched for IgM<sup>+</sup> MBCs, the plasma  
249 antibody response against MSP1 in both children and adults is dominated by IgG.  
250 However, IgM responses against other merozoite antigens may be better developed, in  
251 particular in adults.

252

253 **The anti-MSP1 plasma IgG repertoire has limited diversity, high levels of amino**  
254 **acid substitutions, and mainly overlaps with sequences found in classical**  
255 **memory B cells**

256 To further explore the connection between the plasma cell and MBC compartments of  
257 the humoral immune response, we performed an integrative analysis of the plasma anti-  
258 MSP1 IgG and B cell receptor repertoires in adult donor 2, who was selected based on

259 the availability of additional PBMCs and plasma. Although the results of this experiment  
260 will require confirmation in additional individuals, this is the first analysis of its kind in a  
261 malaria-experienced person and will provide valuable insight into the molecular  
262 characteristics of the anti-MSP1 plasma antibody repertoire after life-long exposure to  
263 *P. falciparum*. In a previous study, we generated B cell receptor sequencing (BCR-seq)  
264 data of antibody heavy chain variable regions of naïve B cells, classical MBCs, and  
265 atypical MBCs (30). The full BCR-seq data set and all sequences obtained from MSP1-  
266 specific MBCs were used to construct a personalized, donor-specific reference heavy  
267 chain antibody variable region sequence database. We then isolated anti-MSP1 IgG  
268 from plasma using commercially available 19 kDa C-terminal fragment of MSP1  
269 (MSP1<sub>19</sub>), which limited our analysis to the most conserved domain of MSP1 (31, 32).  
270 We analyzed the anti-MSP1<sub>19</sub> IgG preparation by high-resolution liquid chromatography  
271 with tandem mass spectrometry and searched the obtained spectra against the donor-  
272 specific antibody variable region database (**Figure 5A**). This step allowed us to identify  
273 the full-length antibody sequences that these short peptide spectra were derived from.  
274 Eighteen anti-MSP1<sub>19</sub> IgG lineages were identified, of which four lineages made up over  
275 75% of all plasma anti-MSP1<sub>19</sub> IgG (**Figure 5B, Supplementary table 3**), suggesting  
276 that the anti-MSP1 plasma IgG repertoire is relatively limited in diversity. The 18  
277 antibody lineages were dominated by sequences that were found among IgG<sub>1</sub><sup>+</sup> and  
278 IgG<sub>3</sub><sup>+</sup> classical MBCs, all of which had relatively high levels of amino acid substitutions  
279 (>15%) (**Figure 5B**). These results suggest that MSP1-specific B cell lineages can give  
280 rise to both plasma cells and classical memory B cells, but not atypical MBCs. Two  
281 relatively abundant antibody lineages (comprising 23.5% and 6.9% of anti-MSP1<sub>19</sub>

282 plasma IgG) overlapped with IgG<sup>+</sup> classical MBC lineages that were expanded in the  
283 bulk BCR-seq data (5 and 4 clonal B cell members, respectively). Both of these  
284 lineages used IGHV1-69 and IGHJ6 and had long HCDR3 sequences of 24 and 21  
285 amino acid residues, respectively, suggesting that these characteristics may have  
286 contributed to the selection and expansion of both MBC and plasma cell populations.  
287 Long HCDR3s were also observed among the other IgG clonal lineages (average of all  
288 lineages, 18 amino acid residues; **Supplementary table 3**), although the most  
289 abundant IgG (representing 24.7% of all anti-MSP1<sub>19</sub> plasma IgG) had an HCDR3 of 10  
290 amino acid residues. A third antibody lineage with low abundance (<0.1%) matched with  
291 an expanded B cell lineage, consisting of two clonal IgM<sup>+</sup> atypical MBC members that  
292 had relatively high levels of amino acid substitutions (>10%). Except for these three  
293 expanded lineages, all other clonotypes were found as a single sequence in the bulk  
294 BCR-seq data set. These results highlight that the abundance of antibody clonotypes in  
295 the plasma is not necessarily reflected by an expansion of the corresponding MBC  
296 lineages, pointing towards different selective mechanisms that govern MBC and plasma  
297 cell development.

298

### 299 **Analysis of an expanded B cell lineage detected in both plasma IgG and memory** 300 **B cells**

301 To further analyze antibody characteristics that may influence their selection and  
302 expansion among plasma cells and MBCs, we compared the anti-MSP1 IgG sequences  
303 detected in plasma with those derived from MSP1-specific MBCs. Only the largest  
304 MSP1-specific mAb lineage was detected among the anti-MSP1<sub>19</sub> antibody lineages

305 identified in plasma, potentially because other MSP1-specific mAbs target epitopes in  
306 other parts of the MSP1 protein. Two mAb sequences of this clonal lineage, mAb10 and  
307 mAb22, were found in plasma at a percentage of 6.8% and 0.1% of all anti-MSP1 IgG  
308 detected, respectively, making it the fifth largest clonotype in the circulation. Despite  
309 having highly similar heavy chain variable regions, including eight shared amino acid  
310 substitutions and a long HCDR3 sequence (21 amino acid residues, **Supplementary**  
311 **figure 2**), mAb10 and mAb22 had different light chains. Like all other members of the  
312 clonal lineage (total n = 9), mAb22 had a lambda light chain, while mAb10 contained a  
313 kappa light chain. mAb10 was more abundant in plasma (6.8%), but was the only  
314 member of the MBC lineage with a kappa light chain. The opposite was observed for  
315 the lambda light chain variants, found at 0.1% of all anti-MSP1 plasma IgG, but  
316 representing eight out of nine members of the MSP1-specific MBC lineage. This  
317 difference in relative abundance of lineage members in different B cell compartments  
318 may be related to the preferential differentiation of high-affinity B cells to plasma cells  
319 and lower-affinity B cells to MBCs (33). For mAb10 and mAb22, it would therefore be  
320 expected that mAb10 has higher antigen-binding affinity. We determined binding affinity  
321 of mAb10 and mAb22 to MSP1 using a chaotropic ELISA with urea and observed that  
322 mAb10 indeed showed higher binding affinity to MSP1 than mAb22 (**Figure 6A**). The  
323 observation that mAb10 and mAb22 had different light chains suggests that antigen  
324 binding by these mAbs is dominated by their heavy chain. To test this, we expressed  
325 mAb22 with light chains from unrelated non-MSP1-binding antibodies and observed that  
326 it was still reactive with MSP1<sub>3D7</sub>, albeit with lower binding affinity (**Figure 6B**). These  
327 results suggest that the heavy chain of mAb22 (and presumably mAb10) is sufficient for

328 binding to MSP1, but that its light chain is important for optimal binding to antigen. This  
329 raised the question whether the difference in binding affinity between mAb10 and  
330 mAb22 is caused by the different light chains used by the two mAbs. For each mAb, we  
331 therefore compared binding affinity between the antibody expressed with its own light  
332 chain and a chimeric antibody in which the light chain was swapped. Expression of  
333 mAb10 with the mAb22 light chain resulted in a reduction of binding affinity, while the  
334 binding affinity of mAb22 was unchanged when expressed with the mAb10 light chain  
335 (**Figure 6C**). These results suggest that the light chain of mAb10 may play a role in the  
336 increased binding affinity of mAb10 over mAb22, but is dependent on the mAb10 heavy  
337 chain for this effect. Interestingly, despite higher binding affinity, mAb10 showed  
338 reduced activity in a growth inhibition assay as compared to mAb22 (**Figure 2C**).  
339 Collectively, these results highlight characteristics of the individual members of an  
340 MSP1-specific clonal B cell lineage that may have influenced their selection and fate.

341

## 342 **Discussion**

343 The prevalence and magnitude of antibody responses against *P. falciparum* merozoite  
344 antigens have been extensively studied. However, much remains unknown about the  
345 molecular characteristics of anti-merozoite antibodies and the connections between the  
346 MBC and plasma cell compartments. This information will increase our understanding of  
347 how durable B cell immunity develops and how this may be harnessed for vaccine  
348 development. Here, we compared the phenotype and molecular characteristics of MBCs  
349 against the most abundant merozoite surface antigen, MSP1, between children and  
350 adults living in a region of high *P. falciparum* transmission in Uganda. In addition, we

351 analyzed cross-strain reactivity among anti-MSP1 plasma IgM and IgG in both children  
352 and adults. Finally, we analyzed the overlap between the MBC and plasma antibody  
353 compartments in detail for one adult to better understand the processes that drive B cell  
354 selection and fate decisions.

355

356 Our results showed that children harbored a larger fraction of MSP1-specific IgM<sup>+</sup> MBCs  
357 than adults, in line with a recent report (16). Interestingly, based on these observations,  
358 one might expect that the plasma anti-MSP1 antibody response would also be  
359 dominated by IgM, but this was not the case. In both adults and children, the level of  
360 anti-MSP1 in plasma was much lower than that of anti-MSP1 IgG. We recognize that it  
361 is difficult to directly compare IgM and IgG measurements due to potential differences  
362 between secondary antibodies used in these assays. However, our control samples  
363 from recovered COVID-19 patients demonstrate that we were able to measure IgM  
364 reactivity, yet we detected plasma IgM reactivity against MSP1 in only a small  
365 percentage of adults. These observations suggest that malaria-experienced children  
366 develop a strong IgG response against MSP1 that is not reflected in the MBC  
367 compartment. One explanation for the relative lack of IgG<sup>+</sup> MBCs in children could be  
368 that the B cell response predominantly gives rise to short-lived IgG<sup>+</sup> plasmablasts,  
369 whereas germinal center reactions are limited. Since germinal center responses are  
370 essential for the development of long-lived plasma cells and MBCs, this would explain  
371 the relatively quick waning of anti-parasite plasma IgG and MBCs in children in the  
372 absence of exposure, as seen in children living in malaria-endemic regions with a  
373 distinct dry season (18, 19). It has been shown that *P. falciparum* infections can lead to



374 dysregulation of various components of the immune system that are essential for the  
375 formation of germinal centers, including dendritic cells and T follicular helper cells (34-  
376 37). In addition, the abundant development of plasmablasts during *Plasmodium*  
377 infection in rodents directly limited the generation of germinal centers as a result of  
378 nutrient depletion (38). In this scenario, IgM<sup>+</sup> MBCs would mainly develop outside of  
379 germinal centers, which would be in agreement with the low levels of somatic  
380 hypermutation that we observed. An alternative explanation for our observation could be  
381 that anti-merozoite IgG<sup>+</sup> MBCs are formed equally efficiently in both children and adults  
382 but undergo recall shortly after their formation in children as a result of repetitive *P.*  
383 *falciparum* infections with high parasitemia, whereas the lower antigenic load of  
384 asymptomatic infections in adults would allow for a longer lifespan of IgG<sup>+</sup> MBCs. This  
385 theory would be in line with the increase in the percentage of merozoite-specific MBCs  
386 with age that is observed in individuals who live in malaria-endemic regions (19). In  
387 support of this theory is our observation that the few IgG<sup>+</sup> MBCs isolated from children  
388 already had relatively high levels of amino acid substitutions, suggestive of multiple  
389 rounds of affinity maturation in germinal centers. It is also supported by our observation  
390 of a lack of clonal connections between IgG<sup>+</sup> MBCs at two time points six months apart  
391 in two five-year old children living in a high transmission region in Uganda, while we did  
392 find clonally related sequences among IgM<sup>+</sup> MBCs between the same two time points  
393 (Gonzales *et al.*, in press). These data could suggest that the IgG<sup>+</sup> MBC compartment in  
394 children undergoes more rapid turnover than the IgM<sup>+</sup> MBC compartment, or that the  
395 IgM<sup>+</sup> MBC compartment has more self-renewing capacity (39). It is difficult to untangle  
396 various potential scenarios of how B cell responses develop and are influenced by the

397 chronic and repetitive nature of *P. falciparum* infections. More longitudinal studies in the  
398 same individuals will be needed to track the fate of parasite-specific IgG<sup>+</sup> MBCs after  
399 their formation.

400

401 We observed a low level of plasma IgM against both MSP1 and whole merozoites as  
402 compared to plasma IgG. This raises the question of how much IgM contributes to the  
403 control of *P. falciparum* infections. IgM responses against a variety of *P. falciparum*  
404 antigens have been reported in several studies, in particular in high transmission  
405 regions (40-43), but there is conflicting evidence on the durability of the IgM response  
406 and its role in parasite inhibition. Boyle *et al.* reported that IgM responses against MSP2  
407 were sustained in children living in Kenya during a period with low parasite transmission  
408 (14). In contrast, Walker *et al.* concluded that IgM responses against five other  
409 merozoite antigens decreased rapidly following *P. falciparum* malaria in children living in  
410 Ghana, whereas IgG responses against these five antigens were maintained for a  
411 longer period of time (43). These conflicting observations may be the result of  
412 differences between the assays used to assess these antibody responses, or  
413 differences in the development of IgM responses under different transmission intensities  
414 or against different parasite antigens. An association between IgM reactivity against *P.*  
415 *falciparum* antigens, including MSP1<sub>19</sub>, AMA1, MSP3, and GLURP, and protection  
416 against malaria was reported by some (14, 44, 45), but not by others (46). When tested  
417 at the same concentration, purified plasma IgM from malaria-experienced individuals  
418 had equal opsonic phagocytosis activity and two-fold lower fixation capacity of C1q, the  
419 primary component of the classical complement pathway, as compared to plasma IgG,

420 but induced nine-fold higher deposition of components of the membrane attack complex  
421 (14, 16). While these results suggest that IgM can indeed contribute to parasite  
422 inhibition, the concentration of IgM in plasma is almost one order of magnitude lower  
423 than that of IgG (average, 1.5 g/l for IgM versus 11 g/l for IgG, (47, 48)). Therefore, the  
424 relative contributions of IgM and IgG to parasite inhibition remain to be determined.  
425 Finally, a passive immunization study showed that IgG-depleted plasma from malaria-  
426 experienced adults had no effect on parasitemia in children with *P. falciparum* malaria,  
427 whereas treatment with IgG from the same individuals resulted in a dramatic decrease  
428 of parasite counts (49), suggesting that IgG is the main effector antibody responsible for  
429 parasite control.

430

431 The acquisition of high levels of amino acid substitutions in IgG<sup>+</sup> MBCs from both  
432 children and adults suggests that these cells are the product of multiple rounds of  
433 affinity selection. We also detected several B cells with long HCDR3s, similar to broadly  
434 neutralizing antibodies against HIV (50), although this was not a universal characteristic  
435 of anti-MSP1 mAbs. In addition, we observed that children and adults had equally high  
436 IgG reactivity against MSP1 3D7, but that reactivity against MSP1 HB3 was lower in  
437 children. This suggests that the IgG response continues to broaden with subsequent *P.*  
438 *falciparum* infections, resulting in a larger fraction of IgG directed against conserved  
439 epitopes. The broadening of antibody responses, high mutational load, and expansion  
440 of clonal MSP1-specific B cell lineages is suggestive of strong selection pressure on the  
441 B cell response as a result of *P. falciparum* infections. We believe that our observations  
442 regarding mAb10 and mAb22, two members of an MSP1-specific IgG<sup>+</sup> MBC lineage

443 that share the same heavy chain but have different light chains, are additional evidence  
444 of strong forces on B cell selection and development. The difference in light chain usage  
445 between mAb10 and mAb22 raises the question how these mAbs are developmentally  
446 related. One possibility is that mAb10 and mAb22 were derived from a B cell precursor  
447 that underwent cell division upon heavy chain rearrangement in the bone marrow, giving  
448 rise to multiple daughter cells that each underwent light chain rearrangement  
449 independently. In this scenario, the shared amino acid mutations would be the result of  
450 convergent evolution selecting for higher affinity antigen binding. In a second scenario,  
451 a precursor B cell activated by antigen could have undergone secondary light chain  
452 rearrangement in the germinal center. In this case, the kappa light chain-bearing mAb10  
453 would likely be evolutionarily closer to this precursor, and mAb22 (and all other MBCs in  
454 this lineage) would be derived from this secondary rearrangement event and have  
455 undergone further diversifying selection. We were unable to determine whether mAb10  
456 and mAb22 developed as a result of convergent evolution or clonal lineage  
457 diversification. However, our results suggest that the light chains of these antibodies  
458 may affect antibody binding affinity. This could, on its own, have resulted in the  
459 preferential differentiation of the higher affinity mAb10 variant into a plasma cell and the  
460 lower affinity mAb22 variant into an MBC. Further studies into the relationship between  
461 the plasma cell and MBC compartments for MSP1 and other merozoite antigens are  
462 currently ongoing in our laboratories.

463

464 In conclusion, we performed an analysis of the MBC compartment and antibody  
465 responses against MSP1 in children and adults living under high *P. falciparum*

466 transmission conditions. We observed that children predominantly harbor MSP1-specific  
467 IgM<sup>+</sup> MBCs, while the MBC response had shifted to IgG<sup>+</sup> B cells in adults. In contrast to  
468 this difference in isotype among MSP1-specific MBCs, both children and adults  
469 demonstrated strong anti-MSP1 plasma IgG responses, while anti-MSP1 plasma IgM  
470 responses were minimal. IgG<sup>+</sup> MBCs carried high levels of somatic hypermutations and  
471 clonal expansion, suggestive of ongoing B cell selection over the course of sequential  
472 *P. falciparum* infections. Finally, we directly compared the overlap between the MSP1-  
473 specific MBC compartment and anti-MSP1 plasma IgG, revealing that the same  
474 molecular characteristics observed in the MBC compartment were also dominant in the  
475 plasma IgG compartment. Collectively, our results provide new insights into the  
476 development of B cell responses against *P. falciparum*, in particular about the  
477 similarities and differences between MBC and antibody responses.

478

## 479 **Materials and methods**

### 480 **Ethics approval statement**

481 Participants were enrolled in the Tororo Child Cohort or the Program for Resistance,  
482 Immunology, Surveillance, and Modeling of Malaria (PRISM) Cohort, and provided  
483 written consent for the use of their samples for research. These cohort studies were  
484 approved by the Makerere University School of Medicine Research and Ethics  
485 Committee (SOMREC) and the University of California, San Francisco Human  
486 Research Protection Program & IRB. The use of cohort samples was approved by the  
487 Institutional Review Board of the University of Texas Health Science Center at San  
488 Antonio. Donors 1 and 2 were anonymous blood donors at Mbale regional blood bank in

489 Eastern Uganda, who consented to the use of their blood for research. The use of  
490 samples from anonymous blood donors was considered not human research by the  
491 Institutional Review Board of the University of Texas Health Science Center at San  
492 Antonio.

493

494 COVID-19 samples used in this study were received de-identified from the University of  
495 Texas Health San Antonio COVID-19 Repository. This repository was reviewed and  
496 approved by the University of Texas Health Science Center at San Antonio Institutional  
497 Review Board. All study participants provided written informed consent prior to  
498 specimen collection for the repository to include collection of associated clinical  
499 information and use of left-over clinical specimens for research. The COVID-19  
500 Repository utilizes an honest broker system to maintain participant confidentiality and  
501 release of de-identified data or specimens to recipient investigators.

502

### 503 **Participants**

504 Malaria-experienced participants were residents of Eastern Uganda, a region with  
505 extremely high malaria transmission intensity (annual entomological inoculation rate in  
506 the region estimated at 125 infectious bites per person per year (51). In this region,  
507 children between five and ten years of age start to develop protective immune  
508 responses against malaria but are typically still susceptible to disease. Children above  
509 ten years of age and adults have developed protective immune responses, evidenced  
510 by no signs of clinical malaria despite high exposure, demonstrated by household

511 entomological and epidemiological measures, including documented asymptomatic  
512 parasitemia.

513

#### 514 **MSP1 expression and tetramer synthesis**

515 To produce C-terminal biotinylated 3D7 MSP1, human Expi293F cells (Thermo  
516 #A14635) were cultured, passaged, and transfected with the plasmids MSP1-bio  
517 (Addgene #47709) and secretedBirA-8his (Addgene #32408) at a 4:1 (w/w) ratio  
518 according to Thermo's protocol. Both plasmids were a kind gift from Gavin Wright (52,  
519 53). Biotin (Thermo #PI21336) was added to a final concentration of 100  $\mu$ M  
520 immediately after adding the transfection mix. Cell were cultured in either non-baffled  
521 polycarbonate flasks with a vent cap (Fisher #PBV12-5) or in glass Erlenmeyer flasks  
522 loosely covered with aluminum foil to allow for gas exchange. Cells were successfully  
523 passaged in volumes as low as 5 ml. Absence of mycoplasma contamination was  
524 confirmed using the MycoAlerta Plus mycoplasma detection kit (Lonza #LT07705).  
525 Culture supernatants were collected 5 – 7 days post-transfection by centrifuging the  
526 culture at 4,000  $\times$  g for 25 min. at RT. A 10 kDa cutoff Protein Concentrator PES  
527 (Thermo #88527) was used (5,000  $\times$  g at 4°C) to exchange culture medium containing  
528 free biotin for PBS (pH 7.2) (> 100,000 dilution) and to concentrate the protein to a final  
529 volume of 0.5 – 1 ml. The 3D7 MSP1 protein was mixed with 6 – 12 volumes of PBS  
530 (pH 5.5) in a final volume of six ml and was subsequently loaded onto gravity flow  
531 columns (Thermo #29924) containing CaptAvidin agarose (Thermo #C21386) for  
532 purification. After three washes with PBS (pH 5.5) and five 6 ml elutions with PBS (pH  
533 10.5), the elutions were pooled (30 ml) and the pH was immediately neutralized by

534 adding 12 ml PBS (pH 5.5). After concentrating, the protein was quantified using the  
535 Coomassie Plus (Bradford) Assay Kit (Thermo #23236) on a NanoDrop One  
536 spectrophotometer, according to the manufacturer's instructions, visualized by SDS-  
537 PAGE (**Supplementary Figure 3A**), diluted to 1 mg/ml, aliquoted, and stored at -70°C.

538

539 Since each streptavidin molecule has the ability to bind four biotinylated MSP1  
540 molecules, MSP1 tetramers were made by incubating MSP1 in a tube revolver (Thermo  
541 #88881001) at 40 rpm and RT for 30 min. with streptavidin-PE (Thermo #S866) at a 6:1  
542 molar ratio. After this incubation, the tetramers were washed with PBS (pH 7.2) using a  
543 Vivaspin centrifugal concentrator (Sartorius #VS0141) three times for 5 min. at 15,000 ×  
544 g at RT. To make decoy tetramers, streptavidin-PE was first conjugated to Alexa-fluor  
545 647 (Thermo #A20186) per manufacturer's instructions. This double-conjugated  
546 streptavidin was then coupled to *R. norvegicus* CD200 (Addgene #36152 (53)) as  
547 described above.

548

#### 549 **SDS-PAGE**

550 As a quality control step, purified MSP1 and antibodies were visualized on a  
551 polyacrylamide gel. Purified samples were mixed with Laemmli buffer and NuPage  
552 sample reducing agent (Thermo #NP0004; not added for monoclonal antibodies),  
553 incubated at 85°C for two min. The samples were run on a 4 – 12% Bis-Tris gel  
554 (Thermo #NP0321BOX) with MOPS running buffer (Thermo #NP0001) at 200 V for 50



555 min. The proteins were stained using Imperial Coomassie protein stain (Thermo  
556 #PI24615) per manufacturer's instructions.

557

### 558 **MSP1-specific B cells isolations**

559 Cryopreserved peripheral blood mononuclear cells (PBMCs) from malaria-experienced  
560 children and adults were thawed in a water bath at 37°C and immediately mixed with  
561 pre-warmed thawing medium (IMDM Glutamax (Thermo #31980030) supplemented  
562 with 10% heat-inactivated fetal bovine serum (FBS) of US origin (Sigma #TMS-013-B)  
563 and 33 U/ml universal nuclease (Thermo #88700)) and then centrifuged (5 min. at 250 ×  
564 g and RT). The cell pellet was resuspended in thawing medium and viable cells were  
565 counted by adding 10 µl filtered 0.2% trypan blue in PBS to 10 µl of the cell suspension  
566 on a Cellometer Mini (Nexcelom) automated cell counter. Next, cells were pelleted by  
567 centrifugation (5 min. at 250 × g and RT) and resuspended in isolation buffer (PBS  
568 supplemented with 2% heat-inactivated FBS and 1 mM EDTA) at 50 million live cells/ml  
569 and filtered through a 35 µm sterile filter cap (Corning #352235) to break apart any  
570 aggregated cells. B cells were isolated using StemCell's EasySep Human B Cell  
571 Isolation Kit (#17954) according to manufacturer's instruction. After washing with PBS,  
572 the isolated B cells were incubated with 1 µl LIVE/DEAD Fixable Aqua Dead Cell Stain  
573 Kit (Thermo #L34965) per 1 ml cell suspension, per manufacturer's instructions. After  
574 washing the B cells with cold PBS and resuspending them in 50 µl cold PBS with 1%  
575 bovine serum albumin (BSA) (Sigma #A7979), the cells were first stained with 40 nM of  
576 decoy tetramer (10 min. in the dark on ice) and then with 20 nM of MSP1 tetramer (30  
577 min. in the dark on ice), followed by a wash with 1 ml of cold PBS/1% BSA (5 min. at

578 250 × g and RT). Tetramer-bound B cells were selected using StemCell's EasySep  
579 Human PE Positive Selection Kit (#17664) and subsequently stained on ice for 30 min.  
580 with an antibody panel against B cell surface markers (**Supplementary table 4**).  
581 UltraComp eBeads (Thermo #01222242) were used to prepare compensation controls  
582 for each fluorophore per manufacturer's instructions. Before acquisition on a BD  
583 FACS Aria II cell sorter, the cells were washed with 3 ml of cold PBS with 1% BSA (5  
584 min. at 250 × g and 4°C), diluted to 20 – 30 million cells/ml in PBS with 1% BSA, and  
585 filtered into a FACS tube with filter cap. Lymphocytes were gated using forward and  
586 sideward scatter, followed by doublet exclusion and gating on live cells. MSP1-specific  
587 mature IgG<sup>+</sup> and IgM<sup>+</sup> B cells (CD19<sup>+</sup>, CD20<sup>+</sup>) were gated (PE<sup>+</sup>, AF647<sup>-</sup>) and single  
588 cells were sorted into 100 µl IMDM/Glutamax/10% FBS in a well of a 96-well plate  
589 (Corning #353072). One day prior to the sort, each well was seeded with 30,000  
590 adherent, CD40L-expressing 3T3 cells (kind gift from Dr. Mark Connors, NIH) in 100 µl  
591 IMDM/Glutamax/10% FBS containing 2× MycoZap Plus-PR (Lonza #VZA-2021), 100  
592 ng/ml human IL-2 (GoldBio #1110-02-50), 100 ng/ml human IL-21 (GoldBio #1110-21-  
593 10), 5 µg/ml TLR9-activator ODN2006 (IDT DNA, sequence  
594 TCGTCGTTTTGTCGTTTTGTCGTT), and 60 µg/ml transferrin (Sigma #616424) to  
595 promote expansion and differentiation of B cells into antibody-secreting cells (54, 55).  
596 After incubation at 37°C and 8% CO<sub>2</sub> for two weeks, the wells were screened for the  
597 production of IgM or IgG by enzyme-linked immunosorbent assay (ELISA).

598

599 **Enzyme-linked immunosorbent assays**

600 To detect IgG and IgM, 96-well ELISA plates (Corning #3361) were coated with either  
601 goat anti-human IgG (Sigma #I2136) or IgM (Sigma #I1636) antibody at a concentration  
602 of 4 and 8 µg/ml, respectively, diluted in PBS, at a total volume of 100 µl per well. After  
603 a one hour incubation at 37°C or O/N at 4°C, each well was washed once using slowly  
604 running (approximately 900 ml / min.) deionized water. This washing method resulted in  
605 significantly higher specificity than other methods tested in the lab (using a plate washer  
606 with water or PBS containing 0.1% tween-20, or a squeeze bottle filled with PBS  
607 containing 0.1% tween-20). All subsequent washes were performed this way. 150 µl  
608 blocking buffer (one-third Non-Animal Protein (NAP)-Blocker (G-Biosciences #786-  
609 190P) and two-thirds PBS) was added to each well to prevent non-specific binding.  
610 After one hour of incubation at 37°C, the wells were washed three times and 50 µl B cell  
611 culture supernatant diluted 1:1 in dilution buffer (1% NAP Blocker in PBS; total volume  
612 100 µl) was added per well. Plates were incubated for two hours at 37°C and washed  
613 five times. Then, either 100 µl 1:2500 diluted (1% NAP Blocker in PBS) HRP-conjugated  
614 anti-human IgG antibody (BioLegend #410902) or 1:5000 HRP-conjugated anti-human  
615 IgM antibody (Sigma #AP114P) was added to each well. After incubation for one hour at  
616 37°C and three washes, HRP activity was detected using 50 µl TMB (Thermo  
617 #PI34024). Plates were incubated in the dark at RT and the oxidation reaction was  
618 stopped by adding 50 µl 0.18M H<sub>2</sub>SO<sub>4</sub> (Fisher #FLA300-212) per well when the  
619 negative controls (wells that received buffer when test wells received culture  
620 supernatant) started to color. Absorbance was measured at 450 nm using a BioTek  
621 Synergy H4 microplate reader. A human IgG (Sigma #I2511) or IgM (Sigma #I8260-  
622 1MG) standard curve (ten three-fold serial dilutions starting at 20 µg/ml) was used to

623 quantify samples. Wells with values >27 ng/ml were considered positive. This cutoff was  
624 determined based on our observation that the amplification of heavy and light chain  
625 variable regions always failed from cultures with a lower concentration.

626

627 ELISAs to confirm reactivity of MSP1-specific antibodies were performed as described  
628 above with the following modifications. Plates were coated with 50  $\mu$ l in-house produced  
629 MSP1<sub>3D7</sub> per well at a concentration of 16  $\mu$ g/ml (0.8  $\mu$ g/well). Coated plates were  
630 incubated for 1 hour at 37°C or overnight at 4°C and all subsequent incubations were  
631 done at RT instead of 37°C. To prevent non-specific binding, the wells were blocked  
632 with 200  $\mu$ l PBS containing 0.1% tween-20 and 3% non-fat milk powder (SACO), which  
633 significantly increased specificity of the assay (compared to NAP blocker). After  
634 discarding the blocking buffer from the wells, the plates were not washed. Purified  
635 antibodies were tested at a final concentration of 2.5  $\mu$ g/ml in 100 – 200  $\mu$ l in PBS  
636 containing 0.1% tween-20 and 1% non-fat milk powder. The plates were washed six  
637 times prior to adding the detection antibody, and four times prior to adding TMB  
638 substrate. To analyze binding affinity of monoclonal antibodies to MSP1<sub>3D7</sub>, chaotropic  
639 ELISAs were performed similar to the above descriptions, with the following  
640 modifications. Wells were coated with 0.2  $\mu$ g protein and the final concentration of the  
641 antibodies that were tested was 0.5  $\mu$ g/ml. Following the incubation with anti-MSP1  
642 antibodies, the plates were washed four times. Then, urea (Fisher #U15-500) was  
643 added to wells at the following concentrations: 0, 1, 2, 3, 4, 5 and 8M (in 100  $\mu$ l PBS  
644 with 0.1% tween-20 and 1% milk powder). After a 15-minute incubation at RT, plates  
645 were washed four times. The IC<sub>50</sub> (the molar concentration of urea required to reduce

646 antibody binding to MSP1 by 50%) was calculated using non-linear regression analysis  
647 in GraphPad Prism 9. Urea concentrations were log-transformed prior to analysis. OD  
648 values for each technical replicate were normalized by setting the smallest OD to 0%  
649 and the largest OD to 100%. The IC<sub>50</sub> values of three technical replicates were  
650 averaged to obtain the final IC<sub>50</sub> for an experiment.

651

652 ELISAs to detect antibody reactivity against merozoites were performed as described  
653 for MSP1-specific antibodies above with the following modifications. Free merozoites  
654 were coated at 500,000 merozoites per well in 100 µl PBS, followed by overnight  
655 incubation at 4°C. Merozoite count was estimated based on culture parasitemia. Plasma  
656 samples were tested at a 1:200 dilution in a total volume of 100 µl.

657

### 658 **Amplification of antibody heavy and light chain variable regions**

659 MSP1-specific B cells that successfully expanded in culture were collected by  
660 centrifugation (5 min. at 250 × g and RT) and stored at -70°C in 50 µl Tri-Reagent  
661 (Zymo #R2050-1-200). Heavy and light chain variable regions were amplified from  
662 MSP1-specific B cells by cDNA synthesis and a series of PCR reactions, shown in  
663 **Supplementary figure 4A**. All primer sequences can be found in **Supplementary table**  
664 **5**. mRNA was isolated using Zymo's Direct-zol RNA Microprep kit (#R2060), eluted in  
665 15 µl elution buffer and then mixed with 0.7 µl reverse primer (10 µM, 200 mM final  
666 concentration (f/c) in 35 µl PCR reaction volume) specific for the IgG, or IgM, heavy  
667 chain (primers #7 and #297) plus 0.7 µl light chain specific reverse primers (10 µM):

668 #108 and #109,), and incubated for two minutes at 65°C. Single stranded cDNA was  
669 synthesized immediately by adding 0.7 µl SMARTScribe reverse transcriptase (100  
670 U/µl, f/c 2 U/µl, Takara Bio #639537), 7 µl First-Strand buffer (f/c 1×), 7 µl DTT (20 mM,  
671 f/c 4 mM), 0.7 µl dNTPs (10 mM each, f/c 200 µM each, Sigma #DNTP-10), 1.75 µl  
672 RNase OUT (40 U/µl, f/c 2 U/µl, Thermo #10777019), 0.7 µl template switch oligo (TSO)  
673 (10 µM, f/c 200 nM, IDT DNA; #110, **Supplementary table 5**), nuclease-free water till  
674 35 µl and subsequent incubation at 42°C for 2 hours. The TSO was designed with two  
675 isodeoxynucleotides at the 5' end to prevent TSO concatemerization and three  
676 riboguanosines at the 3' end for increased binding affinity to the appended  
677 deoxycytidines (property of the Takara reverse transcriptase) (56, 57). The single-  
678 stranded cDNA was immediately purified using Zymo's RNA Clean & Concentrator kit  
679 (#R1016) using Zymo's appended protocol to purify fragments >200 nucleotides and  
680 was eluted in 10 µl elution buffer. This critical clean-up step ensured that any unused  
681 TSO was removed, preventing it from inhibiting the subsequent PCR reactions by  
682 serving as template for the forward primer. Immediately after, heavy and light chain  
683 variable regions were amplified by PCR in one reaction mix using 8.5 µl purified cDNA,  
684 10 µl AccuStart II PCR SuperMix (QuantaBio #95137), 0.9 µl 10 µM forward primer  
685 #106 (f/c 0.45 µM, **Supplementary table 5**), and 0.2 µl of the reverse primers (10 µM)  
686 used to synthesize the cDNA (#7, #297, #108, and #109, each at f/c 0.1 µM). Cycling  
687 conditions were 94°C for 3 min., 35 cycles of 30 sec. at 94°C, 30 sec. at 55°C and 35  
688 sec. at 72°C, followed by 5 min. at 72°C. A second, nested amplification was required to  
689 obtain enough amplicon DNA, and was done separately for heavy chain, kappa light  
690 chain, and lambda light chain variable regions, using AccuStart II PCR SuperMix, and 2

691  $\mu$ l of the first, unpurified PCR as template in a total reaction volume of 20  $\mu$ l. Mixes of  
692 primers (**Supplementary figure 4A**) as described by Hua-Xin Liao *et al.* (58) were used  
693 for this second PCR, with a final concentration of 0.1  $\mu$ M for each individual primer.  
694 Reverse primer #67 was added for the heavy chain variable region PCR to allow for  
695 amplification of variable regions originating from IgG<sub>2</sub>, IgG<sub>3</sub> and IgG<sub>4</sub> mRNA, in addition  
696 to #30 which was specific for IgG<sub>1</sub>. Cycling conditions were as described above, except  
697 for the extension step (shortened to 30 sec.) and the annealing step, which was 30 sec.  
698 at 60°C for the IgG1 heavy chain variable region, 30 sec. at 63°C for the IgM heavy  
699 chain variable region, and 30 sec. at 50°C for the light chain variable regions.

700

701 Linear IgG expression cassettes (58) were synthesized by PCR using 3 overlapping  
702 DNA fragments: a promoter (705 bp), a variable region and a constant region (IgG<sub>1</sub>  
703 heavy chain: 1188 bp; pentameric IgG<sub>1</sub> heavy chain: 1326 bp; kappa light chain: 568  
704 bp; lambda light chain: 534 bp). Details about the assembly of linear expression  
705 cassettes are described by Liao *et al.* (58). All fragments were amplified in a 100  $\mu$ l  
706 reaction using 20 ng plasmid template (HV0023 – HV0026 (58) or the IgG<sub>1</sub> expression  
707 plasmid containing the IgM multimerization sequence (see below)), 4  $\mu$ l forward primer  
708 (10  $\mu$ M), 4  $\mu$ l reverse primer (10  $\mu$ M), and QuantaBio AccuStart II PCR supermix (2 $\times$ )  
709 using the following cycling program: 94°C for 3 min., 35 cycles of (94°C for 30 sec.,  
710 68°C for 30 sec., and 72°C for 40 – 75 sec. (1 min. per 1000 bp)) and 72°C for 5 min.  
711 Primers 53 and 54 were used for the promoter fragment, 55 and 58 for the heavy chain  
712 constant region fragment, 56 and 58 for the kappa light chain constant region fragment,  
713 57 and 58 for the lambda light chain constant region fragment, and 55 and 494 for the

714 pentameric IgG<sub>1</sub> heavy chain constant region fragment (**Supplementary table 5**). The  
715 overlapping PCRs were done as follows. The cycling program was the same for all  
716 overlapping PCRs: 98°C for 1 min., 30× (98°C for 20 sec., 68°C for 15 sec., 72°C for 60  
717 sec.), 72°C for 10 min. Two ng of each fragment (promoter, constant region, variable  
718 region) was used as template in a 25 µl PCR reaction with 2× KAPA HiFi Hot Start  
719 Ready Mix (Roche #KK2602) and 1 µl (10 µM) of the following forward and reverse  
720 primers: 50 and 51 for the IgG1 heavy chain, 50 and 52 for the kappa and lambda light  
721 chain, and 50 and 469 for the IgG<sub>1</sub> heavy chain with IgM multimerization domain  
722 (**Supplementary table 5**). The final size of the linear expression cassettes was ~2300  
723 bp for the IgG1 heavy chain, ~2400 bp for the IgG1 heavy chain with IgM  
724 multimerization domain, and 1600 bp for the kappa and lambda light chains  
725 (**Supplementary figure 4B**). All linear expression cassettes were purified and  
726 sequence verified by Sanger sequencing. Variable region sequences were analyzed  
727 with IMGT/V-QUEST (28) using default settings to identify V(D)J gene usage and amino  
728 acid substitutions.

729

### 730 **Generation of antibody expression plasmids**

731 Antibody variable regions were cloned into expression plasmids from Invivogen  
732 (#pfusess-hchg1, #pfuse2ss-hclk, #pfuse2ss-hcll2). The variable heavy and light chain  
733 regions were amplified from the linear expression cassettes (2 µl at 1 ng/µl) using 10 µl  
734 NEB Q5 Hot Start HiFi PCR master mix (#M0494S), 6 µl nuclease-free water and 1 µl  
735 sequence-specific F and R primer (10 µM, f/c 500 nM) that were based on the results of  
736 analysis using IMGT/VQUEST (28). These primers introduced restriction sites (EcoRI &



737 NheI for hchg1, EcoRI & BsiWII for hclk, and EcoRI & AvrII for hcll2). Annealing  
738 temperatures were primer sequence dependent and were calculated using NEB's Tm  
739 calculator to match the salt concentration in their buffer. In an attempt to express the  
740 variable regions from IgM<sup>+</sup> B cells as a multimer (pentamer/hexamer mix) instead of a  
741 monomer, we modified the IgG<sub>1</sub> heavy chain expression plasmid (15). The IgM  
742 multimerization sequence PTLYNVSLVMSDTAGTCY  
743 (CCAACGCTCTATAATGTCTCTTTGGTTATGTCCGACACAGCCGGTACCTGCTAT)  
744 was cloned into the IgG<sub>1</sub> expression vector at the C-terminus of the open reading frame,  
745 immediately in front of the stop codon, and the leucine at position -139 relative to the  
746 proline in the multimerization sequence was changed into a cysteine. Every plasmid  
747 was Sanger sequence-verified prior to using it as expression vector.

748

#### 749 **Antibody expression and purification**

750 For small scale screening, one ml Expi293F cell cultures in a 6 well plate were  
751 transfected with heavy and light chain linear expression cassettes (1:1 molar ratio)  
752 according to the manufacturer's instructions for 25 – 30 ml cultures (also at 125 rpm).  
753 Heavy and light chain antibody expression plasmids were used at a molar ratio of 1:2 to  
754 transfect 5 ml cultures. The antibodies were purified from the culture supernatant 4 – 6  
755 days later using protein G magnetic beads (Promega #G7472). Purified antibodies and  
756 antibody elution buffer (5 parts elution buffer (100 μM glycine-HCl, pH 2.7) and 1 part  
757 neutralization buffer (2M Tris buffer, pH 7.5)) were buffer exchanged to PBS using 100  
758 kDa cutoff Protein Concentrators (Thermo #88523). The samples were diluted > 50,000  
759 × in PBS by repeated centrifugation at 4,000 × g and 4°C. Purified antibodies were

760 quantified using the Coomassie Plus (Bradford) Assay Kit (Thermo #23236) on a  
761 NanoDrop One spectrophotometer, according to the manufacturer's instructions, and  
762 visualized on SDS-PAGE gel with a standard amount of BSA to confirm protein size and  
763 purity (**Supplementary figure 3B**).

764

### 765 **Parasite culture and merozoite isolation**

766 *P. falciparum* 3D7 strain parasites were cultured (59) in human AB<sup>+</sup> erythrocytes  
767 (Interstate Blood Bank, Memphis, TN, USA) at 3 – 10% parasitemia in complete culture  
768 medium (5% hematocrit). Complete culture medium consisted of RPMI 1640 medium  
769 (Gibco #32404014) supplemented with gentamicin (45 µg/ml final concentration; Gibco  
770 #15710064), HEPES (40 mM; Fisher #BP3101), NaHCO<sub>3</sub> (1.9 mg/ml; Sigma  
771 #SX03201), NaOH (2.7 mM; Fisher #SS266-1), hypoxanthine (17 µg/ml; Alfa Aesar  
772 #A11481-06), L-glutamine (2.1 mM; Corning #25005Cl), D-glucose (2.1 mg/ml; Fisher  
773 #D16-1), and 10% heat-inactivated human AB<sup>+</sup> serum (Valley Biomedical #HP1022).  
774 Parasites were cultured at 37°C in an atmosphere of 5% O<sub>2</sub>, 5% CO<sub>2</sub>, and 90% N<sub>2</sub>.  
775 Before use in cultures, 12.5 ml packed erythrocytes were washed twice with 10 ml cold  
776 incomplete medium (complete culture medium without human serum) and pelleted  
777 between each wash by centrifugation at 500 × g for 8 min. at 4°C (max. acceleration  
778 and weakest break). Washed erythrocytes were resuspended in 2 volumes of complete  
779 medium and stored at 4°C.

780

781 Parasites were synchronized to the ring stage by treatment with 5% D-sorbitol (60)  
782 (Fisher #S459-500). Cultures containing high percentages of ring-stage parasites were  
783 centrifuged at  $250 \times g$  for 5 min. at RT. Pelleted erythrocytes were resuspended in 10  
784 volumes of 5% D-sorbitol in MQ water, vortexed for 30 sec. and incubated for 8 min. at  
785  $37^{\circ}\text{C}$ . The cells were then washed with 5 volumes of complete culture medium ( $250 \times g$   
786 for 5 min. at RT) and resuspended in complete culture medium at 5% hematocrit and  
787 cultured as described above. To obtain tightly synchronized parasites, sorbitol  
788 treatments were performed twice, 14 hours apart.

789 Infected erythrocytes containing parasites in the late-trophozoite and schizont stages  
790 were isolated from culture by magnetic separation (61, 62). Late-stage parasites were  
791 separated from uninfected and ring-infected erythrocytes with a SuperMACS II  
792 Separator (Miltenyi #130-044-104). The magnet was assembled with a D column  
793 (Miltenyi #130-041-201) according to manufacturer's instructions. The column was  
794 equilibrated with 200 ml incomplete medium. An additional 50 ml incomplete medium  
795 was added to the column through the side syringe to remove air bubbles possibly  
796 remaining in the column matrix. A 22 G needle (BD #305155) was attached to the  
797 stopcock to serve as a flow restrictor. For safety purposes the plastic protective sheath  
798 remained on the needle after cutting the end to allow flow of the liquid without exposing  
799 the tip of the needle. Approximately 100 – 200 ml of synchronized parasite culture (5 –  
800 10% parasitemia, 5% hematocrit) 24 – 27 hours following the second sorbitol treatment  
801 (majority of parasites in the early segmented schizont stage, 4 – 6 nuclei visible by  
802 Giemsa staining) were used for merozoite isolation. After passing the parasite culture  
803 through the column, the column was washed from the top with incomplete medium until

804 the flowthrough was clear (usuall ~100 ml). Next, the column was washed with a total of  
805 150 ml incomplete medium (50 ml from the side and 100 ml from the top). Erythrocytes  
806 containing late-stage parasites with high paramagnetic hemozoin levels are  
807 preferentially retained in the column matrix while attached to the magnet (63) allowing  
808 for separation of late-stage parasites from uninfected erythrocytes and early-stage  
809 parasites. The column was removed from the magnet and 60 ml incomplete medium  
810 was used to elute the erythrocytes from the column matrix. The erythrocytes were  
811 pelleted by centrifugation at  $250 \times g$  for 5 min. at RT and were resuspended in 3 ml  
812 complete culture medium. Infected erythrocytes were incubated with E64 (10  $\mu$ M final  
813 concentration, Sigma #324890-1MG) for 8 hours at normal culture conditions to allow  
814 the parasites to develop into fully segmented schizonts while preventing egress from the  
815 erythrocytes. Infected erythrocytes containing schizonts were then pelleted by  
816 centrifugation at  $1,900 \times g$  for 8 min. at RT and the supernatant containing E64 was  
817 removed. A thin smear from the pellet was Giemsa stained and merozoite yield was  
818 assessed by counting the number of fully segmented schizonts present. The pellet was  
819 resuspended in 4 ml incomplete medium. Merozoites were released from the  
820 erythrocytes by passing them through a 1.2  $\mu$ m syringe filter (Pall #4190) and were  
821 subsequently pelleted by centrifugation at  $4,000 \times g$  for 10 min. at RT. On average,  $5 \times$   
822  $10^7$  merozoites were collected per 25 ml of synchronized culture. The merozoites were  
823 resuspended in PBS and stored at 4°C for up to one day until used for the ELISA.

824

825 **Immunofluorescence assay**

826 All steps of the immunofluorescence assay were done at RT. A thin blood smear was  
827 made on a microscopy slide from a 1  $\mu$ l drop of E64-treated schizont culture. After  
828 drying for 30 sec., the cells were fixed by loading 1 ml of 4% paraformaldehyde  
829 (Electron Microscopy #15710) on the slide and incubating it for 30 min. The fixed cells  
830 were then washed three times with 1 ml PBS. Following the washes, the cells were  
831 permeabilized with 0.1% Triton-X (Fisher # BP151) in PBS and incubated for 30 min.  
832 The cells were then washed for an additional three washes using PBS. The slide was  
833 treated with blocking buffer (2% BSA, 0.05% Tween-20, 100 mM Glycine, 3 mM EDTA  
834 and 150 mM NaCl in PBS) for one hour. MSP1-specific mAbs were added to the cells at  
835 1  $\mu$ g/ml in 500  $\mu$ l blocking buffer and incubated for one hour. Samples were then  
836 washed again three times using PBS. Goat anti-human IgG conjugated to FITC  
837 (Thermo #A18830) secondary antibody was diluted 1:1000 (1.5  $\mu$ g/ml) in blocking buffer  
838 and then added to the smear to incubate for one hour in the dark. Samples were again  
839 washed three times using PBS in the dark and then allowed to air dry for one hour in the  
840 dark. Slides were mounted using 10  $\mu$ l ProLong Glass mounting medium containing  
841 NucBlue Stain (Thermo #P36985) and sealed with a cover slip. Samples were imaged  
842 using a Zeiss Axio Imager Z1 with Zen Blue software.

843

#### 844 **Luminex assay**

845 100 pmol MSP1<sub>3D7</sub>, MSP1<sub>Dd2</sub>, MSP1<sub>HB3</sub>, and SARS-CoV-2 receptor binding domain  
846 were coupled per  $1 \times 10^6$  MagPlex microspheres (Luminex, #MC10025-ID) using the  
847 Luminex protein coupling kit (#40-50016) per manufacturer's instructions. All  
848 subsequent steps were done at RT and the beads were protected from light using

849 aluminum foil. Coupled beads were pooled, resuspended in buffer A (PBS with 0.05%  
850 Tween 20 (Fisher #BP337), 0.5% BSA (Sigma #A7979), 0.02% sodium azide) and  
851 plated at 1000 beads per well for each protein in a black, flat-bottom 96 well plate (Bio-  
852 Rad #171025001). The beads were washed once. All washes were done with 100  $\mu$ l  
853 PBST (PBS with 0.05% Tween 20) using a handheld magnetic washer (Bio-Rad  
854 #171020100). The incubation time on the magnet was always 2 min. Next, the beads  
855 were incubated with 50  $\mu$ l purified anti-MSP1 antibody (diluted to 1  $\mu$ g/ml using buffer B)  
856 or B cell culture supernatant (diluted 1:1 with buffer B) for 30 min. with constant  
857 agitation (500 rpm, 2.5 mm orbital diameter). Buffer B (0.05% Tween-20, 0.5% BSA,  
858 0.02% sodium azide, 0.1% casein (Sigma #C7078), 0.5% PVA (Sigma #P8136) and  
859 0.5% PVP (Sigma #PVP360), 15  $\mu$ g/ml *E. coli* lysate) was prepared a day prior to the  
860 assay since it required the chemicals to dissolve O/N. On the day of the assay, *E. coli*  
861 lysate (MCLAB #ECCL-100) was resuspended in MQ water and added to a final  
862 concentration of 15  $\mu$ g/ml. Prior to use, buffer B was centrifuged at 10,000  $\times$  g for 10  
863 min. After three washes, 50  $\mu$ l secondary antibody diluted in buffer A (PE anti-human  
864 IgG (1:200 dilution; Jackson ImmunoResearch #109-116-098)) or PE anti-human IgM  
865 (1:80 dilution; BioLegend #314507)) was added per well. After 30 min. incubation with  
866 constant agitation, the beads were washed three times and subsequently incubated in  
867 50  $\mu$ l buffer A for 30 min. with constant agitation. After one final wash, the beads were  
868 resuspended in 100  $\mu$ l PBS and fluorescence intensity was measured using a calibrated  
869 and validated Bio-Rad Bio-Plex 200 machine.

870

871 **Growth inhibition assay**

872 *P. falciparum* isolate 3D7 parasites were pre-synchronized at the ring stage with a 5%  
873 D-sorbitol (Fisher #S459-500) treatment as described above, followed four days later by  
874 two additional 5% D-sorbitol treatments 14 hours apart (60). At the late trophozoite /  
875 early schizont stage (24 hours after the third D-sorbitol treatment), parasitemia was  
876 determined by inspection of a Giemsa-stained blood smear. The smear was also used  
877 to confirm correct parasite staging. Immediately after, 20  $\mu$ l of each antibody (1 mg/ml in  
878 PBS) was added to wells containing 30  $\mu$ l complete medium in a black clear bottom 96-  
879 well plate (Corning #3603). A monoclonal antibody specific for apical membrane antigen  
880 1 (AMA1) was used as a positive control (BEI #MRA-481A). Antibody elution buffer (100  
881 mM glycine-HCl, pH 2.7) that was buffer exchanged to PBS alongside purified  
882 antibodies (see “Antibody expression and purification” above) was used as a negative  
883 control. Fifty  $\mu$ l parasite culture (1% parasitemia and 2% hematocrit) was then added to  
884 wells containing antibody or negative control. Uninfected erythrocytes (2% hematocrit)  
885 were used to determine the background signal. The plate was then incubated at  
886 standard parasite culture conditions (described above) for 48 hours before being  
887 transferred to a -70°C freezer. After overnight incubation of the plate at -70°C, SYBR  
888 green dye (Invitrogen #S7585) was added to lysis buffer (20 mM Tris-HCl (pH7.5), 5  
889 mM EDTA, 0.008% saponin (Sigma # 558255100GM), 0.08% Triton X-100 in MQ  
890 water) at 0.2  $\mu$ l dye per ml of lysis buffer. One hundred  $\mu$ l SYBR green lysis buffer was  
891 added to each well and the plate was incubated in the dark at 37°C for 3 – 6 hours.  
892 Fluorescence (excitation = 495 nm, emission = 525 nm, cutoff = 515 nm) was measured  
893 with a BioTek Synergy H4 plate reader. The instrument was programmed to read the  
894 plate from the bottom after mixing for 5 sec. The average background fluorescence

895 value was subtracted from the fluorescence signal of the wells with infected cells.  
896 Percent growth inhibition was expressed as the reduction in fluorescence signal in wells  
897 incubated with antibody as compared to the negative control.

898

### 899 **Plasma antibody proteomics**

900 Total IgG was isolated from 1 ml plasma using Protein G Plus Agarose (Thermo  
901 #22851) affinity chromatography and cleaved into F(ab')<sub>2</sub> fragments using IdeS  
902 protease. MSP1-specific F(ab')<sub>2</sub> was isolated by affinity chromatography using 1 mg  
903 recombinant MSP1<sub>19</sub> produced in *E. coli* (Meridian Life Sciences, #R01603 and  
904 #R01604) coupled to 0.05 mg dry NHS-activated agarose resin (Thermo #26196) as  
905 follows. F(ab')<sub>2</sub> (10 mg/ml in PBS) was rotated at 8 rpm with antigen-conjugated affinity  
906 resin for 1 hour at RT, loaded into 0.5 ml spin columns (Thermo #89868), washed 12×  
907 with 0.4 ml Dulbecco's PBS (1,000 × g for 30 sec. at RT), and eluted with 0.5 ml  
908 fractions of 1% formic acid. IgG-containing elution fractions were concentrated to  
909 dryness in a speed-vac, resuspended in ddH<sub>2</sub>O, combined, neutralized with 1M Tris /  
910 3M NaOH, and prepared for liquid chromatography–tandem mass spectrometry (LC-  
911 MS/MS) as described previously (64, 65) with the modifications that (i) peptide  
912 separation using acetonitrile gradient was run for 120 min and (ii) data was collected on  
913 an Orbitrap Fusion (Thermo Fisher Scientific) operated at 120,000 resolution using HCD  
914 (higher-energy collisional dissociation) in topspeed mode with a 3 sec. cycle time. B cell  
915 receptor sequencing data was available from a previous study (30). Demultiplexing of  
916 sequence reads and the generation of consensus sequences for UMI groups were  
917 performed as outlined by Turchaninova *et al.* using software tools MIGEC (v1.2.9) and



918 MiTools (v1.5) (66). Sequences with  $\geq 2$  reads were clustered into clonal lineages  
919 defined by 90% HCDR3 amino acid identity using USEARCH (67). LC-MS/MS search  
920 databases were prepared as previously described (64), using custom Python scripts  
921 (available upon request). MS searches, and MS data analyses were performed as  
922 previously described (64, 65), adjusting the stringency of the elution XIC:flowthrough  
923 XIC filter to 2:1.

924

### 925 **Data visualization and statistics**

926 Flow cytometry data were analyzed and plotted using FlowJo (v10.7.1). Dot plots were  
927 generated using the package ggplot2 in RStudio (v1.4.1103) using R (v4.0.4). All other  
928 plots were generated in GraphPad Prism 9, which was also used for statistical analyses.  
929 The statistical test used for each analysis is indicated in the figure legends.

930

### 931 **Data availability statement**

932 The BCR-seq data set analyzed in the current study is available in the NCBI SRA  
933 repository under accession numbers SAMN17497575-7.

934

### 935 **Conflict of interest**

936 The authors declare that the research was conducted in the absence of any commercial  
937 or financial relationships that could be construed as a potential conflict of interest.

938

939 **Author contributions**

940 EMB secured funding for the study, conceived the research question, and designed the  
941 study. SJG performed flow cytometry. SJG, KC, and SB produced recombinant antigens  
942 and monoclonal antibodies and contributed to other experiments. GB performed IFA  
943 and growth-inhibition assays. RAR, RG, and AEB performed merozoite ELISAs. AEB  
944 generated BCR-seq data. KCG and GCI performed plasma IgG proteomics. IS and BG  
945 provided clinical samples and data. SJG, SB, and EMB wrote the manuscript with input  
946 from all other co-authors.

947

948 **Funding**

949 This work was supported by National Institutes of Health/National Institute of Allergy  
950 and Infectious Diseases (R01 AI153425 to E.M.B.). S.J.G and A.E.B. were supported by  
951 Graduate Research in Immunology Program training grant NIH T32 AI138944. R.A.R.  
952 was supported by Translational Science Training award TL1 TR002647. Data were  
953 generated in the Flow Cytometry Shared Resource Facility, which is supported by UT  
954 Health, NIH-NCI P30 CA054174-20 (CTRC at UT Health) and UL1 TR001120 (CTSA  
955 grant) and in the Genome Sequencing Facility, which is supported by UT Health San  
956 Antonio, NIH-NCI P30 CA054174 (Cancer Center at UT Health San Antonio), NIH  
957 Shared Instrument grant 1S10OD021805-01 (S10 grant), and CPRIT Core Facility  
958 Award (RP160732).

959

960 **Abbreviations**

961 BCR B cell receptor  
962 HCDR3 heavy chain complementarity determining region 3  
963 Ig immunoglobulin  
964 MBC memory B cell  
965 mAb monoclonal antibody

966

## 967 **Acknowledgements**

968 We would like to thank Dr. Kevin O. Saunders (Duke Human Vaccine Institute) for  
969 sharing reagents and protocols for the expression of recombinant IgG using linear Ig  
970 heavy and light chain gene expression cassettes from Liao *et al.* The 3T3-msCD40L cell  
971 line was a kind gift from Dr. Mark Connors (National Institute of Allergy and Infectious  
972 Diseases). Plasmids encoding 3D7 MSP1-bio, BirA, and rat CD200 were a kind gift from  
973 Dr. Gavin Wright, (Wellcome Sanger Institute; Addgene plasmids # 47709, 32408, and  
974 36152). The following reagents were obtained through BEI Resources, NIAID, NIH:  
975 *Plasmodium falciparum*, Strain 3D7, MRA-102, contributed by Dr. Daniel J. Carucci; and  
976 Monoclonal Antibody N4-1F6 Anti-*Plasmodium falciparum* Apical Membrane Antigen 1  
977 (AMA1) (produced *in vitro*), MRA-481A, contributed by Dr. Carole A. Long.

978

## 979 **References**

- 980 1. World Health Organization. World malaria report 2020. *World Health Organization,*  
981 *Geneva, Switzerland.* 2020.
- 982 2. Rts SCTP. Efficacy and safety of RTS,S/AS01 malaria vaccine with or without a  
983 booster dose in infants and children in Africa: final results of a phase 3, individually  
984 randomised, controlled trial. *Lancet.* 2015;386(9988):31-45.

- 985 3. Neafsey DE, Juraska M, Bedford T, Benkeser D, Valim C, Griggs A, et al. Genetic  
986 Diversity and Protective Efficacy of the RTS,S/AS01 Malaria Vaccine. *N Engl J*  
987 *Med.* 2015;373(21):2025-37.
- 988 4. Yman V, White MT, Asghar M, Sundling C, Sondén K, Draper SJ, et al. Antibody  
989 responses to merozoite antigens after natural *Plasmodium falciparum* infection:  
990 kinetics and longevity in absence of re-exposure. *BMC Med.* 2019;17(1):22.
- 991 5. Hill DL, Wilson DW, Sampaio NG, Eriksson EM, Ryg-Cornejo V, Harrison GLA, et  
992 al. Merozoite Antigens of *Plasmodium falciparum* Elicit Strain-Transcending  
993 Opsonizing Immunity. *Infect Immun.* 2016;84(8):2175-84.
- 994 6. Fowkes FJ, Richards JS, Simpson JA, and Beeson JG. The relationship between  
995 anti-merozoite antibodies and incidence of *Plasmodium falciparum* malaria: A  
996 systematic review and meta-analysis. *PLoS Med.* 2010;7(1):e1000218.
- 997 7. Boyle MJ, Reiling L, Feng G, Langer C, Osier FH, Aspelung-Jones H, et al. Human  
998 antibodies fix complement to inhibit *Plasmodium falciparum* invasion of erythrocytes  
999 and are associated with protection against malaria. *Immunity.* 2015;42(3):580-90.
- 1000 8. Osier FH, Fegan G, Polley SD, Murungi L, Verra F, Tetteh KK, et al. Breadth and  
1001 magnitude of antibody responses to multiple *Plasmodium falciparum* merozoite  
1002 antigens are associated with protection from clinical malaria. *Infect Immun.*  
1003 2008;76(5):2240-8.
- 1004 9. Osier FH, Feng G, Boyle MJ, Langer C, Zhou J, Richards JS, et al. Opsonic  
1005 phagocytosis of *Plasmodium falciparum* merozoites: mechanism in human  
1006 immunity and a correlate of protection against malaria. *BMC Med.* 2014;12:108.
- 1007 10. Stanisic DI, Fowkes FJ, Koinari M, Javati S, Lin E, Kiniboro B, et al. Acquisition of  
1008 antibodies against *Plasmodium falciparum* merozoites and malaria immunity in  
1009 young children and the influence of age, force of infection, and magnitude of  
1010 response. *Infect Immun.* 2015;83(2):646-60.
- 1011 11. Richards JS, Arumugam TU, Reiling L, Healer J, Hodder AN, Fowkes FJ, et al.  
1012 Identification and prioritization of merozoite antigens as targets of protective human  
1013 immunity to *Plasmodium falciparum* malaria for vaccine and biomarker  
1014 development. *J Immunol.* 2013;191(2):795-809.
- 1015 12. Kana IH, Singh SK, Garcia-Senosaiain A, Dodoo D, Singh S, Adu B, et al. Breadth of  
1016 Functional Antibodies Is Associated With *Plasmodium falciparum* Merozoite  
1017 Phagocytosis and Protection Against Febrile Malaria. *J Infect Dis.* 2019;220(2):275-  
1018 84.
- 1019 13. Reiling L, Boyle MJ, White MT, Wilson DW, Feng G, Weaver R, et al. Targets of  
1020 complement-fixing antibodies in protective immunity against malaria in children. *Nat*  
1021 *Commun.* 2019;10(1):610.

- 1022 14. Boyle MJ, Chan JA, Handayuni I, Reiling L, Feng G, Hilton A, et al. IgM in human  
1023 immunity to *Plasmodium falciparum* malaria. *Sci Adv*. 2019;5(9):eaax4489.
- 1024 15. Thouvenel CD, Fontana MF, Netland J, Krishnamurty AT, Takehara KK, Chen Y, et  
1025 al. Multimeric antibodies from antigen-specific human IgM+ memory B cells restrict  
1026 *Plasmodium* parasites. *J Exp Med*. 2021;218(4).
- 1027 16. Hopp CS, Sekar P, Diouf A, Miura K, Boswell K, Skinner J, et al. *Plasmodium*  
1028 *falciparum*-specific IgM B cells dominate in children, expand with malaria, and  
1029 produce functional IgM. *J Exp Med*. 2021;218(4).
- 1030 17. Akkaya M, Kwak K, and Pierce SK. B cell memory: building two walls of protection  
1031 against pathogens. *Nat Rev Immunol*. 2020;20(4):229-38.
- 1032 18. Crompton PD, Kayala MA, Traore B, Kayentao K, Ongoiba A, Weiss GE, et al. A  
1033 prospective analysis of the Ab response to *Plasmodium falciparum* before and after  
1034 a malaria season by protein microarray. *Proc Natl Acad Sci U S A*.  
1035 2010;107(15):6958-63.
- 1036 19. Weiss GE, Traore B, Kayentao K, Ongoiba A, Doumbo S, Doumtabe D, et al. The  
1037 *Plasmodium falciparum*-specific human memory B cell compartment expands  
1038 gradually with repeated malaria infections. *PLoS Pathog*. 2010;6(5):e1000912.
- 1039 20. Holder AA. The carboxy-terminus of merozoite surface protein 1: structure, specific  
1040 antibodies and immunity to malaria. *Parasitology*. 2009;136(12):1445-56.
- 1041 21. Ghoshal S, Gajendra P, Datta Kanjilal S, Mitra M, and Sengupta S. Diversity  
1042 analysis of MSP1 identifies conserved epitope organization in block 2 amidst high  
1043 sequence variability in Indian *Plasmodium falciparum* isolates. *Malar J*.  
1044 2018;17(1):447.
- 1045 22. Dent AE, Nakajima R, Liang L, Baum E, Moormann AM, Sumba PO, et al.  
1046 *Plasmodium falciparum* Protein Microarray Antibody Profiles Correlate With  
1047 Protection From Symptomatic Malaria in Kenya. *J Infect Dis*. 2015;212(9):1429-38.
- 1048 23. Ogutu BR, Apollo OJ, McKinney D, Okoth W, Siangla J, Dubovsky F, et al. Blood  
1049 stage malaria vaccine eliciting high antigen-specific antibody concentrations confers  
1050 no protection to young children in Western Kenya. *PLoS One*. 2009;4(3):e4708.
- 1051 24. Sheehy SH, Duncan CJ, Elias SC, Choudhary P, Biswas S, Halstead FD, et al.  
1052 ChAd63-MVA-vectored blood-stage malaria vaccines targeting MSP1 and AMA1:  
1053 assessment of efficacy against mosquito bite challenge in humans. *Mol Ther*.  
1054 2012;20(12):2355-68.
- 1055 25. Kanya MR, Arinaitwe E, Wanzira H, Katureebe A, Barusya C, Kigozi SP, et al.  
1056 Malaria transmission, infection, and disease at three sites with varied transmission  
1057 intensity in Uganda: implications for malaria control. *Am J Trop Med Hyg*.  
1058 2015;92(5):903-12.

- 1059 26. Taylor JJ, Martinez RJ, Titcombe PJ, Barsness LO, Thomas SR, Zhang N, et al.  
1060 Deletion and anergy of polyclonal B cells specific for ubiquitous membrane-bound  
1061 self-antigen. *J Exp Med*. 2012;209(11):2065-77.
- 1062 27. Krishnamurty AT, Thouvenel CD, Portugal S, Keitany GJ, Kim KS, Holder A, et al.  
1063 Somatic Hypermutated Plasmodium-Specific IgM(+) Memory B Cells Are Rapid,  
1064 Plastic, Early Responders upon Malaria Rechallenge. *Immunity*. 2016;45(2):402-14.
- 1065 28. Alamyar E, Duroux P, Lefranc MP, and Giudicelli V. IMGT((R)) tools for the  
1066 nucleotide analysis of immunoglobulin (IG) and T cell receptor (TR) V-(D)-J  
1067 repertoires, polymorphisms, and IG mutations: IMGT/V-QUEST and IMGT/HighV-  
1068 QUEST for NGS. *Methods Mol Biol*. 2012;882:569-604.
- 1069 29. Andrews SF, Chambers MJ, Schramm CA, Plyler J, Raab JE, Kanekiyo M, et al.  
1070 Activation Dynamics and Immunoglobulin Evolution of Pre-existing and Newly  
1071 Generated Human Memory B cell Responses to Influenza Hemagglutinin.  
1072 *Immunity*. 2019;51(2):398-410 e5.
- 1073 30. Braddom AE, Bol S, Gonzales SJ, Reyes RA, Musinguzi K, Nankya F, et al. B Cell  
1074 Receptor Repertoire Analysis in Malaria-Naive and Malaria-Experienced Individuals  
1075 Reveals Unique Characteristics of Atypical Memory B Cells. *mSphere*.  
1076 2021;6(5):e0072621.
- 1077 31. Miller LH, Roberts T, Shahabuddin M, and McCutchan TF. Analysis of sequence  
1078 diversity in the Plasmodium falciparum merozoite surface protein-1 (MSP-1). *Mol*  
1079 *Biochem Parasitol*. 1993;59(1):1-14.
- 1080 32. Tanabe K, Mackay M, Goman M, and Scaife JG. Allelic dimorphism in a surface  
1081 antigen gene of the malaria parasite Plasmodium falciparum. *J Mol Biol*.  
1082 1987;195(2):273-87.
- 1083 33. Viant C, Weymar GHJ, Escolano A, Chen S, Hartweger H, Cipolla M, et al.  
1084 Antibody Affinity Shapes the Choice between Memory and Germinal Center B Cell  
1085 Fates. *Cell*. 2020;183(5):1298-311 e11.
- 1086 34. Gotz A, Tang MS, Ty MC, Arama C, Ongoiba A, Doumtable D, et al. Atypical  
1087 activation of dendritic cells by Plasmodium falciparum. *Proc Natl Acad Sci U S A*.  
1088 2017;114(49):E10568-E77.
- 1089 35. Pack AD, Schwartzhoff PV, Zacharias ZR, Fernandez-Ruiz D, Heath WR, Gurung  
1090 P, et al. Hemozoin-mediated inflammasome activation limits long-lived anti-malarial  
1091 immunity. *Cell Rep*. 2021;36(8):109586.
- 1092 36. Portugal S, Obeng-Adjei N, Moir S, Crompton PD, and Pierce SK. Atypical memory  
1093 B cells in human chronic infectious diseases: An interim report. *Cell Immunol*.  
1094 2017;321:18-25.

- 1095 37. Braddom AE, Batugedara G, Bol S, and Bunnik EM. Potential functions of atypical  
1096 memory B cells in Plasmodium-exposed individuals. *Int J Parasitol.*  
1097 2020;50(13):1033-42.
- 1098 38. Vijay R, Guthmiller JJ, Sturtz AJ, Surette FA, Rogers KJ, Sompallae RR, et al.  
1099 Infection-induced plasmablasts are a nutrient sink that impairs humoral immunity to  
1100 malaria. *Nat Immunol.* 2020;21(7):790-801.
- 1101 39. Kenderes KJ, Levack RC, Papillion AM, Cabrera-Martinez B, Dishaw LM, and  
1102 Winslow GM. T-Bet(+) IgM Memory Cells Generate Multi-lineage Effector B Cells.  
1103 *Cell Rep.* 2018;24(4):824-37 e3.
- 1104 40. Duah NO, Weiss HA, Jepson A, Tetteh KK, Whittle HC, and Conway DJ. Heritability  
1105 of antibody isotype and subclass responses to Plasmodium falciparum antigens.  
1106 *PLoS One.* 2009;4(10):e7381.
- 1107 41. Richards JS, Stanisic DI, Fowkes FJ, Tavul L, Dabod E, Thompson JK, et al.  
1108 Association between naturally acquired antibodies to erythrocyte-binding antigens  
1109 of Plasmodium falciparum and protection from malaria and high-density  
1110 parasitemia. *Clin Infect Dis.* 2010;51(8):e50-60.
- 1111 42. Acquah FK, Lo AC, Akyea-Mensah K, Abagna HB, Faye B, Theisen M, et al. Stage-  
1112 specific Plasmodium falciparum immune responses in afebrile adults and children  
1113 living in the Greater Accra Region of Ghana. *Malar J.* 2020;19(1):64.
- 1114 43. Walker MR, Knudsen AS, Partey FD, Bassi MR, Frank AM, Castberg FC, et al.  
1115 Acquisition and decay of IgM and IgG responses to merozoite antigens after  
1116 Plasmodium falciparum malaria in Ghanaian children. *PLoS One.*  
1117 2020;15(12):e0243943.
- 1118 44. Dodoo D, Aikins A, Kusi KA, Lamptey H, Remarque E, Milligan P, et al. Cohort  
1119 study of the association of antibody levels to AMA1, MSP119, MSP3 and GLURP  
1120 with protection from clinical malaria in Ghanaian children. *Malar J.* 2008;7:142.
- 1121 45. Adu B, Cherif MK, Bosomprah S, Diarra A, Arthur FK, Dickson EK, et al. Antibody  
1122 levels against GLURP R2, MSP1 block 2 hybrid and AS202.11 and the risk of  
1123 malaria in children living in hyperendemic (Burkina Faso) and hypo-endemic  
1124 (Ghana) areas. *Malar J.* 2016;15:123.
- 1125 46. Ahmed Ismail H, Ribacke U, Reiling L, Normark J, Egwang T, Kironde F, et al.  
1126 Acquired antibodies to merozoite antigens in children from Uganda with  
1127 uncomplicated or severe Plasmodium falciparum malaria. *Clin Vaccine Immunol.*  
1128 2013;20(8):1170-80.
- 1129 47. Gonzalez-Quintela A, Alende R, Gude F, Campos J, Rey J, Meijide LM, et al.  
1130 Serum levels of immunoglobulins (IgG, IgA, IgM) in a general adult population and  
1131 their relationship with alcohol consumption, smoking and common metabolic  
1132 abnormalities. *Clin Exp Immunol.* 2008;151(1):42-50.

- 1133 48. Khan SR, van der Burgh AC, Peeters RP, van Hagen PM, Dalm V, and Chaker L.  
1134 Determinants of Serum Immunoglobulin Levels: A Systematic Review and Meta-  
1135 Analysis. *Front Immunol.* 2021;12:664526.
- 1136 49. Cohen S, Mc GI, and Carrington S. Gamma-globulin and acquired immunity to  
1137 human malaria. *Nature.* 1961;192:733-7.
- 1138 50. Roskin KM, Jackson KJL, Lee JY, Hoh RA, Joshi SA, Hwang KK, et al. Aberrant B  
1139 cell repertoire selection associated with HIV neutralizing antibody breadth. *Nat*  
1140 *Immunol.* 2020;21(2):199-209.
- 1141 51. Kilama M, Smith DL, Hutchinson R, Kigozi R, Yeka A, Lavoy G, et al. Estimating the  
1142 annual entomological inoculation rate for Plasmodium falciparum transmitted by  
1143 Anopheles gambiae s.l. using three sampling methods in three sites in Uganda.  
1144 *Malar J.* 2014;13:111.
- 1145 52. Crosnier C, Wanaguru M, McDade B, Osier FH, Marsh K, Rayner JC, et al. A library  
1146 of functional recombinant cell-surface and secreted P. falciparum merozoite  
1147 proteins. *Mol Cell Proteomics.* 2013;12(12):3976-86.
- 1148 53. Bushell KM, Sollner C, Schuster-Boeckler B, Bateman A, and Wright GJ. Large-  
1149 scale screening for novel low-affinity extracellular protein interactions. *Genome*  
1150 *Res.* 2008;18(4):622-30.
- 1151 54. Huang J, Doria-Rose NA, Longo NS, Laub L, Lin CL, Turk E, et al. Isolation of  
1152 human monoclonal antibodies from peripheral blood B cells. *Nat Protoc.*  
1153 2013;8(10):1907-15.
- 1154 55. Lindner JM, Cornacchione V, Sathe A, Be C, Srinivas H, Riquet E, et al. Human  
1155 Memory B Cells Harbor Diverse Cross-Neutralizing Antibodies against BK and JC  
1156 Polyomaviruses. *Immunity.* 2019;50(3):668-76 e5.
- 1157 56. Zajac P, Islam S, Hochgerner H, Lonnerberg P, and Linnarsson S. Base  
1158 preferences in non-templated nucleotide incorporation by MMLV-derived reverse  
1159 transcriptases. *PLoS One.* 2013;8(12):e85270.
- 1160 57. Kapteyn J, He R, McDowell ET, and Gang DR. Incorporation of non-natural  
1161 nucleotides into template-switching oligonucleotides reduces background and  
1162 improves cDNA synthesis from very small RNA samples. *BMC Genomics.*  
1163 2010;11:413.
- 1164 58. Liao HX, Levesque MC, Nagel A, Dixon A, Zhang R, Walter E, et al. High-  
1165 throughput isolation of immunoglobulin genes from single human B cells and  
1166 expression as monoclonal antibodies. *J Virol Methods.* 2009;158(1-2):171-9.
- 1167 59. Trager W, and Jensen JB. Human malaria parasites in continuous culture. *Science.*  
1168 1976;193(4254):673-5.



- 1169 60. Lambros C, and Vanderberg JP. Synchronization of Plasmodium falciparum  
1170 erythrocytic stages in culture. *J Parasitol.* 1979;65(3):418-20.
- 1171 61. Staalsoe T, Giha HA, Dodoo D, Theander TG, and Hviid L. Detection of antibodies  
1172 to variant antigens on Plasmodium falciparum-infected erythrocytes by flow  
1173 cytometry. *Cytometry.* 1999;35(4):329-36.
- 1174 62. Boyle MJ, Wilson DW, Richards JS, Riglar DT, Tetteh KK, Conway DJ, et al.  
1175 Isolation of viable Plasmodium falciparum merozoites to define erythrocyte invasion  
1176 events and advance vaccine and drug development. *Proc Natl Acad Sci U S A.*  
1177 2010;107(32):14378-83.
- 1178 63. Paul F, Roath S, Melville D, Warhurst DC, and Osisanya JO. Separation of malaria-  
1179 infected erythrocytes from whole blood: use of a selective high-gradient magnetic  
1180 separation technique. *Lancet.* 1981;2(8237):70-1.
- 1181 64. Lavinder JJ, Wine Y, Giesecke C, Ippolito GC, Horton AP, Lungu OI, et al.  
1182 Identification and characterization of the constituent human serum antibodies  
1183 elicited by vaccination. *Proc Natl Acad Sci U S A.* 2014;111(6):2259-64.
- 1184 65. Voss WN, Hou YJ, Johnson NV, Delidakis G, Kim JE, Javanmardi K, et al.  
1185 Prevalent, protective, and convergent IgG recognition of SARS-CoV-2 non-RBD  
1186 spike epitopes. *Science.* 2021;372(6546):1108-12.
- 1187 66. Turchaninova MA, Davydov A, Britanova OV, Shugay M, Bikos V, Egorov ES, et al.  
1188 High-quality full-length immunoglobulin profiling with unique molecular barcoding.  
1189 *Nat Protoc.* 2016;11(9):1599-616.
- 1190 67. Edgar RC. Search and clustering orders of magnitude faster than BLAST.  
1191 *Bioinformatics.* 2010;26(19):2460-1.
- 1192

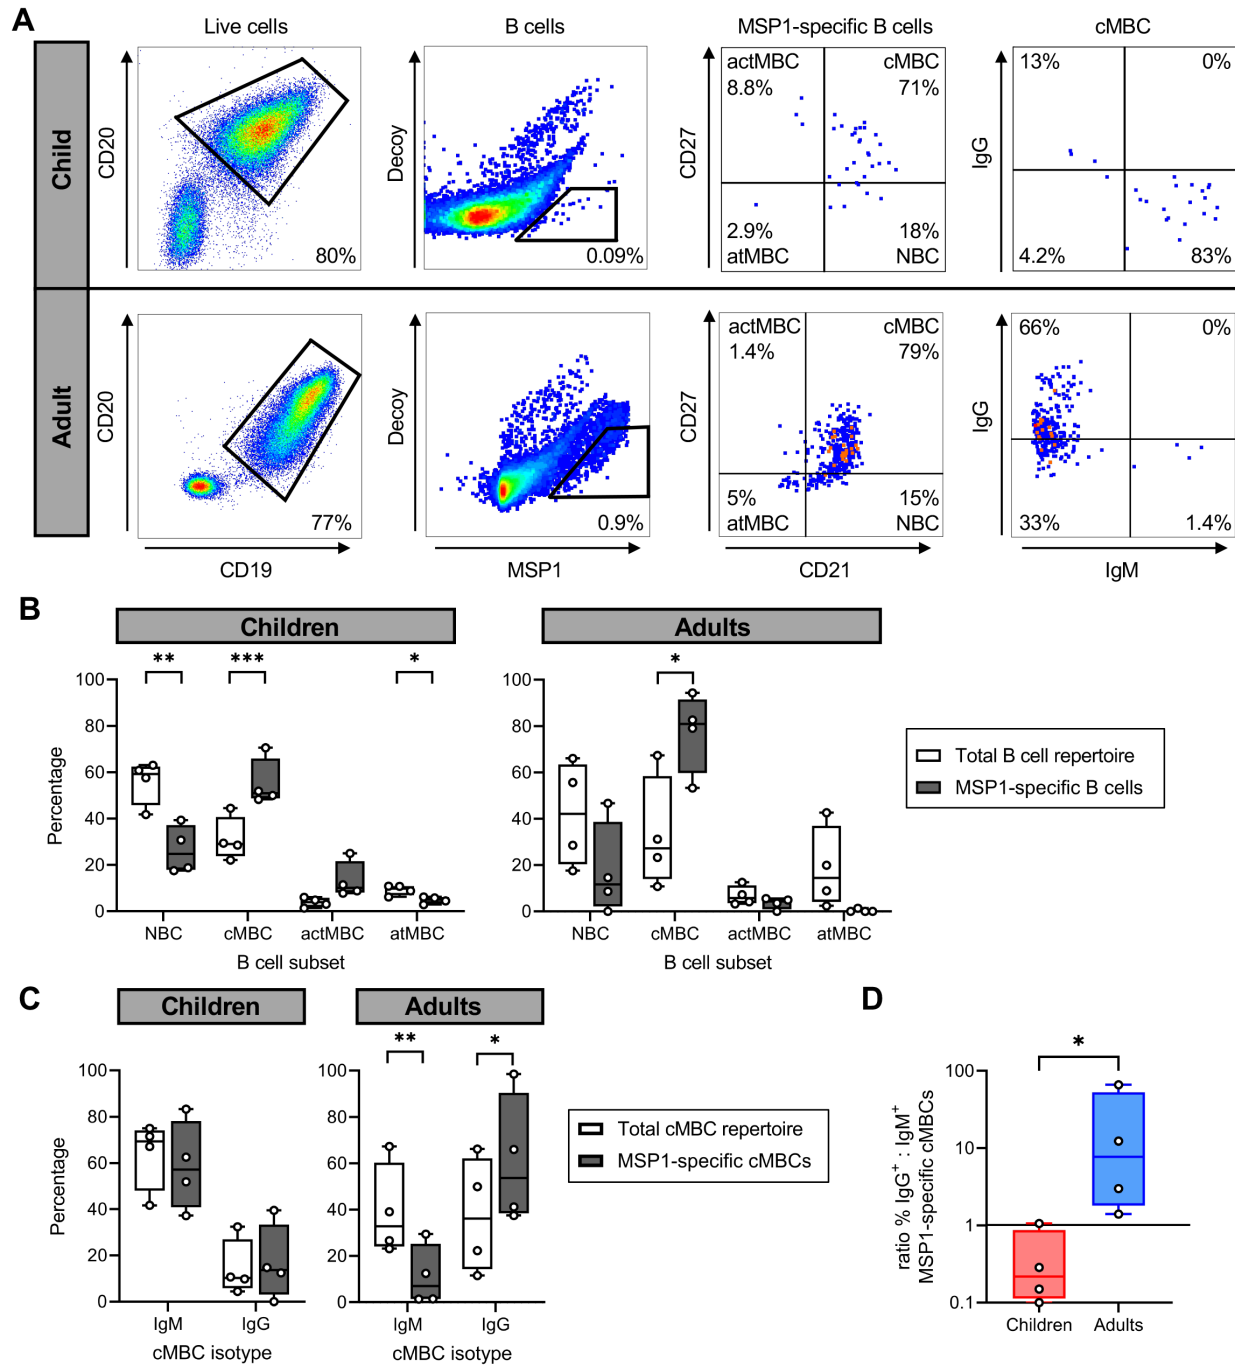

1193

1194 **Figure 1: The isotype of MSP1-specific B cells in malaria-experienced children**

1195 **and adults. A)** Representative flow cytometry gating for the sorting and analysis of

1196 MSP1-specific B cells. The four major B cell subsets are defined as follows: naïve B

1197 cells (NBC), CD21<sup>+</sup> CD27<sup>-</sup>; classical memory B cells (cMBC), CD21<sup>+</sup> CD27<sup>+</sup>; activated

1198 memory B cells (actMBC), CD21<sup>-</sup> CD27<sup>+</sup>; and atypical memory B cells (atMBC), CD21<sup>-</sup>  
1199 CD27<sup>-</sup>. Data are shown as pseudocolor plots, in which overlapping cells in the plots  
1200 showing MSP1-specific B cells and cMBCs are shown in orange and red. **B)** Relative  
1201 abundance of major B cell subsets among the total B cell repertoire and among MSP1-  
1202 specific B cells in partially immune children (n = 4) and immune adults (n = 4). **C)** The  
1203 percentage of IgM<sup>+</sup> and IgG<sup>+</sup> B cells among the total repertoire of cMBCs and among  
1204 MSP1-specific cMBCs in malaria-experienced children (n = 4) and adults (n = 4). In  
1205 panels B and C, differences were tested for statistical significance using a paired  
1206 Student's t-test, even though a non-parametric test would be more appropriate given the  
1207 small sample size. However, the paired non-parametric alternative (Wilcoxon signed-  
1208 rank test) does not return a P value lower than 0.13 when using groups of 4. **D)** The  
1209 ratio of the percentage of IgG<sup>+</sup> over IgM<sup>+</sup> MSP1-specific cMBCs in malaria-experienced  
1210 children and adults. A data point with value 0 was plotted at 0.1 for visualization  
1211 purposes. The difference between groups was tested for statistical significance using a  
1212 Mann Whitney test. \*\*\* P < 0.001; \*\* P < 0.01; \* P < 0.05  
1213



1224 experiments are shown. Scale bar is 5  $\mu$ m. **C)** *P. falciparum* growth inhibition by six  
1225 select mAbs isolated from adult donor 2. Inhibition was calculated relative to a negative  
1226 control. Results shown are the average + SEM from three independent experiments.  
1227 mAb 481A served as a positive control.  
1228

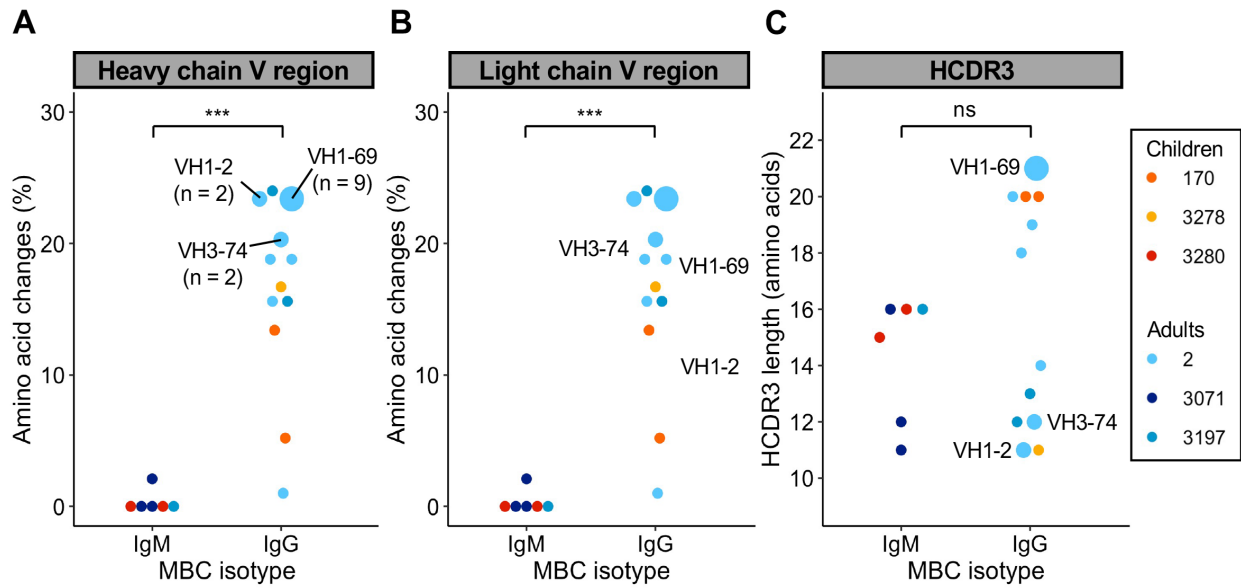

1229

1230 **Figure 3: Sequence analysis of the variable heavy and light chains of MSP1-**

1231 **specific memory B cells. A-B) Percentage of amino acid changes in the V gene**

1232 **segments of the heavy chain (A) and light chain (B) variable regions. C) Length of**

1233 **HCDR3s. In all graphs, sequences from expanded clonal lineages were grouped. The**

1234 **VH gene usage and size of expanded clonal lineages are indicated. Differences**

1235 **between IgM<sup>+</sup> (n = 6) and IgG<sup>+</sup> (n = 13 for heavy chains / n = 14 for light chains) MBC**

1236 **lineages were evaluated for statistical significance using a Mann Whitney test.**

1237

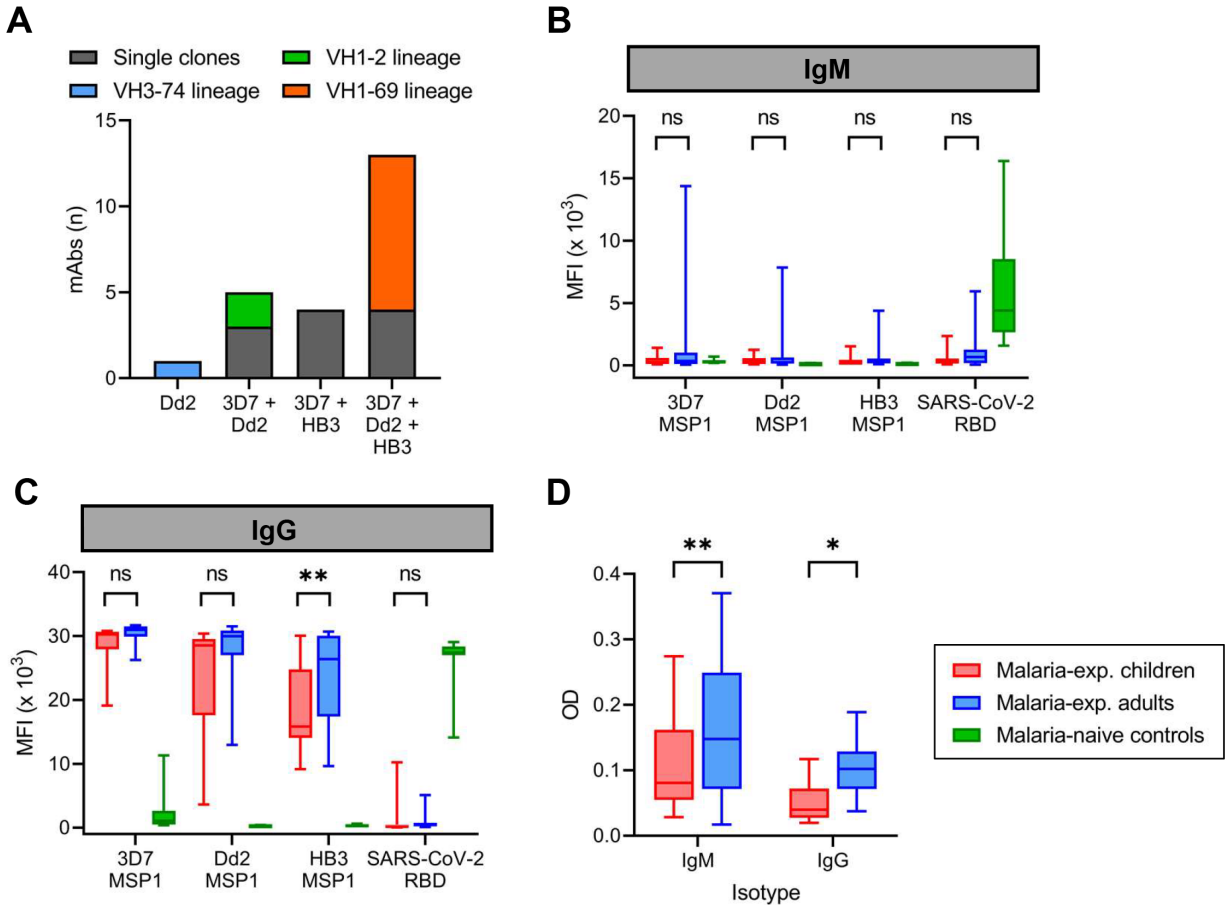

1238

1239 **Figure 4: Reactivity of monoclonal antibodies and plasma IgM and IgG against**

1240 **different strains of *P. falciparum*. A)** The number of anti-MSP1 recombinant

1241 monoclonal antibodies (mAbs) with reactivity against recombinant MSP1 of three

1242 different *P. falciparum* strains in a Luminex assay. Each mAb is shown as a stacked

1243 block and is color-coded based on whether it was a single clone or derived from an

1244 expanded clonal B cell lineages. The VH3-74 lineage consisted of two MBCs, of which

1245 we were unable to retrieve the light chain for the second mAb. For this reason, only a

1246 single mAb of this lineage was tested here. **B-C)** Reactivity of plasma IgM (B) and IgG

1247 (C) from malaria-experienced children (n = 18) and adults (n = 24), and malaria-naïve

1248 recovered US COVID-19 patients (control; n = 10) against recombinant MSP1 of *P.*

1249 *falciparum* strains 3D7, Dd2, and HB3, as well as SARS-CoV-2 receptor binding domain  
1250 (RBD), as determined by Luminex assay. Values shown are mean fluorescence  
1251 intensity (MFI). **D**) Reactivity of plasma IgM and IgG from malaria-experienced children  
1252 (n = 18) and adults (n = 24) against whole merozoites by ELISA. Values shown are  
1253 optical densities after subtraction of background values obtained using pooled  
1254 unexposed plasma from US donors. Data shown in panels B – D were tested for  
1255 statistical significance using a two-way repeated measures ANOVA, followed by  
1256 comparisons between children and adults using Šídák's post-hoc test, corrected for  
1257 multiple comparisons. \*\* P < 0.01; \* P < 0.05  
1258



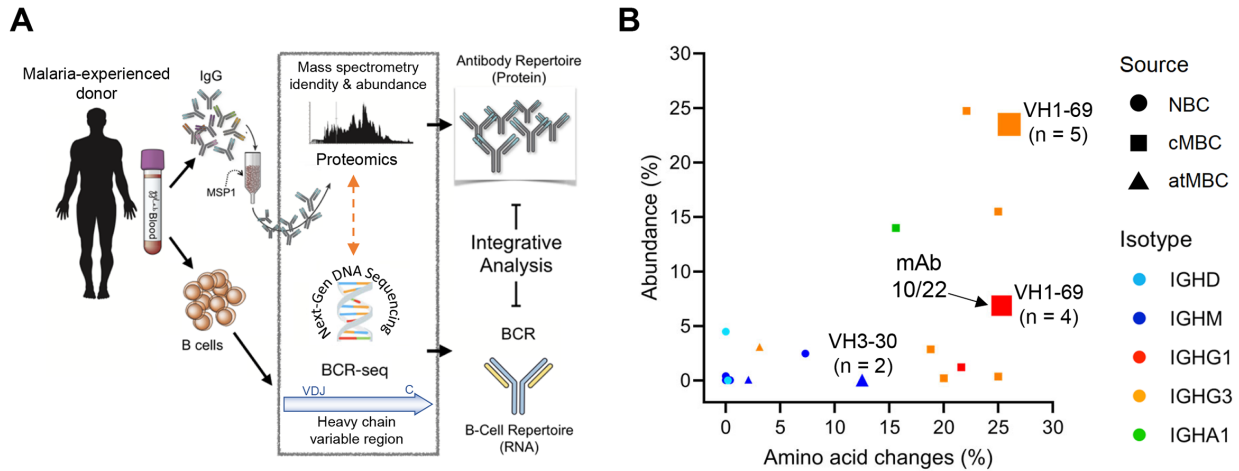

1259

1260 **Figure 5: Analysis of the repertoire of anti-MSP1<sub>19</sub> IgG in the plasma of a malaria-**

1261 **experienced adult. A) Schematic overview of the experimental pipeline. B) The**

1262 percentage amino acid changes in the V gene segment of the heavy chain variable

1263 region (as determined by B cell receptor sequencing; X axis) plotted against the

1264 abundance of the corresponding IgG in plasma (Y axis). The size of the data points

1265 indicates the number of clonal sequences found in the B cell receptor sequencing

1266 (BCR-seq) data set, as a measure of the size of the clonal B cell lineage. The three

1267 lineages that were expanded in the BCR-seq data set are indicated with a number, that

1268 represents the number of clonal sequences identified by BCR-seq. The shape of the

1269 data point shows the B cell subset among which the sequence was found (NBC, naïve

1270 B cell; cMBC, classical memory B cell; atMBC, atypical memory B cell), while the color

1271 indicates the B cell isotype. The data point corresponding to mAb10 and mAb22

1272 (isolated from MSP1-specific B cells) is indicated with an arrow.

1273

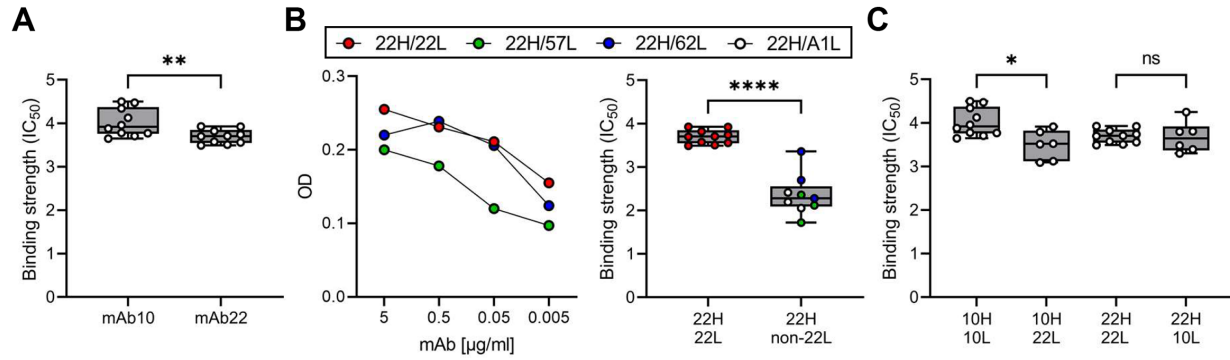

1274

1275 **Figure 6: Binding affinity of mAb10 and mAb22 to MSP1<sub>3D7</sub>. A)** The binding strength

1276 of mAb10 and mAb22 as determined by chaotropic ELISA. Binding strength ( $IC_{50}$ ) is

1277 defined as the concentration of urea that results in loss of 50% of mAb binding. A total

1278 of 10 replicates from three independent experiments are shown. Differences were

1279 tested for statistical significance using the Wilcoxon matched-pairs signed rank test,

1280 with pairs were defined as antibodies analyzed on the same plate. **B)** The binding of

1281 mAb22 and antibodies that consisted of the heavy chain of mAb22 and a light chain of

1282 an unrelated, non-MSP1-reactive antibody to MSP1<sub>3D7</sub> by regular ELISA (left) and

1283 chaotropic ELISA (right). Differences in binding strength between replicates of mAb22

1284 ( $n = 10$ ) and chimeric antibodies ( $n = 9$ , three replicates for each of three unrelated light

1285 chains that were combined for analysis) were tested for statistical significance using the

1286 Mann Whitney test. **C)** The binding strength of mAb10 and mAb22 ( $n = 10$  replicates

1287 each) expressed with their own light chains or chimeric mAbs in which the light chains

1288 were swapped ( $n = 6$  replicates each). In all panels, data points are the average of three

1289 technical replicates. Differences between antibodies with the same heavy chain but a

1290 different light chain were tested for statistical significance using a Kruskal-Wallis test,

1291 followed by comparisons between select groups using Dunn's post-hoc test, corrected

1292 for multiple comparisons. \*\*\*\*  $P < 0.0001$ ; \*\*  $P < 0.01$ ; \*  $P < 0.05$
